1 **When a phenotype is not the genotype: Implications of phenotype**  
2 **misclassification and pedigree errors in genomics-assisted breeding**  
3 **of sweetpotato [*Ipomoea batatas* (L.) Lam.]**

4 Dorcus C. Gemenet<sup>1\*</sup>, Bert De Boeck<sup>2</sup>, Guilherme Da Silva Pereira<sup>3</sup>, Mercy N. Kitavi<sup>1</sup>, Reuben  
5 T. Ssali<sup>4</sup>, Obaiya Utoblo<sup>4</sup>, Jolien Swanckaert<sup>5</sup>, Edward Carey<sup>4</sup>, Wolfgang Gruneberg<sup>2</sup>, Benard  
6 Yada<sup>6</sup>, Craig Yencho<sup>3</sup>, Robert O. M. Mwangi<sup>5</sup>

7 <sup>1</sup>International Potato Center, ILRI Campus, Nairobi-Kenya

8 <sup>2</sup>International Potato Center, Apartado 1558, Lima-Peru

9 <sup>3</sup>North Carolina State University, Raleigh-USA

10 <sup>4</sup>International Potato Center, Kumasi-Ghana

11 <sup>5</sup>International Potato Center, Kampala-Uganda

12 <sup>6</sup>National Crops Resources Research Institute, Namulonge-Uganda

13

14 \*Corresponding author: International Potato Center, ILRI Campus, Old Naivasha Road, 25171-  
15 00603, Nairobi, Kenya; Email: [d.gemenet@cgiar.org](mailto:d.gemenet@cgiar.org); Telephone: 254 20 422 3637; ORCID:  
16 0000-0003-4901-1694

17

18 **Abstract**

19 Experimental error, especially through genotype misclassification and pedigree errors, negatively  
20 affects breeding decisions by creating ‘noise’ that compounds the genetic signals for selection.  
21 Unlike genotype-by-environment interactions, for which different methods have been proposed  
22 to address, the effect of ‘noise’ due to pedigree errors and misclassification has not received  
23 much attention in most crops. We used two case studies in sweetpotato, based on data from the  
24 International Potato Center’s breeding program to estimate the level of phenotype  
25 misclassification and pedigree error and to demonstrate the consequences of such errors when  
26 combining phenotypes with the respective genotypes. In the first case study, 27.7% phenotype  
27 misclassification was observed when moving genotypes from a diversity panel through *in-vitro*,  
28 screenhouse and field trialing. Additionally, 22.7% pedigree error was observed from  
29 misclassification between and within families. The second case study involving multi-  
30 environment testing of a full-sib population and quantitative trait loci (QTL) mapping showed  
31 reduced genetic correlations among pairs of environments in mega-environments with higher  
32 phenotype misclassification errors when compared to the mega-environments with lower  
33 phenotype misclassification errors. Additionally, no QTL could be identified in the low genetic  
34 correlation mega-environments. Simulation analysis indicated that phenotype misclassification  
35 was more detrimental to QTL detection when compared to missingness in data. The current  
36 information is important to inform current and future breeding activities involving genomic-  
37 assisted breeding decisions in sweetpotato, and to facilitate putting in place improved workflows  
38 that minimize phenotype misclassification and pedigree errors.

39

40 **Key words**

41 Pedigree errors, phenotype misclassification, multi-environment testing, QTL-x-environment  
42 interaction.

43

## 44 Introduction

45 It is a generally accepted concept that the environment in which an organism is placed affects the  
46 expression and function of genes responsible for a trait (**Allard and Bradshaw, 1964; Baye et**  
47 **al., 2011**). The magnitude of phenotypic plasticity to adapt to different environments is  
48 genotype-dependent, hence the environment can interact with a genotype to shape the phenotypic  
49 traits, leading to genotype-by-environment (GE) interaction (**Genard et al., 2017**). In plant  
50 breeding, GE interaction is expressed as either genotypic rank-change among genotypes due to  
51 varied responses to changing environments or as absolute change in trait values without a rank  
52 change (**Crossa, 2012**). Since these interactions are unpredictable as the environments  
53 themselves, they confound breeding efficiency and reduce genetic gains from plant breeding  
54 (**Crossa, 2012; Osei et al., 2018**).

55 The need to account for GE interactions in making plant breeding decisions has become  
56 even dire with the current advent in applying genomic selection to increase breeding efficiency.  
57 Defined by **Meuwissen et al. (2001)**, genomic selection is a breeding tool that uses information  
58 from all molecular markers across the genome to predict the breeding value of an individual. To  
59 be applied, this tool requires testing of models using phenotypic and genotypic information from  
60 a sample of the breeding population selected to represent the diversity (training population) in  
61 the said breeding population that is targeted for prediction (prediction population). This approach  
62 therefore calls for generating both phenotypic and genotypic data of the training population, and  
63 only genotypic data for the untested prediction population. The development of next-generation,  
64 high-throughput genotyping methods like genotyping-by-sequencing (**Elshire et al., 2011**) have  
65 drastically reduced genotyping costs thereby enhancing generation of large volumes of genotypic  
66 data quite fast. This has therefore left phenotyping as the bottleneck in plant breeding.

67 Precise phenotypic data of the training population is a prerequisite for improving the  
68 accuracy of predicting untested genotypes in genomic selection models (**Velazco et al., 2017**).  
69 However, GE interactions are known to increase with increasing number of genotypes and  
70 environments. **Allard and Bradshaw (1964)** showed that GE interactions calculated as  
71  $GE\ interactions = \frac{GE!}{G!E!}$ , lead to exponential increase in interactions as both genotypes and  
72 environments increase. For example, they showed that two genotypes in two environments  
73 would result in about four GE interactions while 10 genotypes in 10 environments would result  
74 in up to 400 GE interactions. Plant breeding experiments always deal with far greater numbers of  
75 genotypes. Additionally, the unbalanced nature of the number of genotypes and experimental  
76 designs in most plant breeding experiments increases heterogeneity thereby complicating the  
77 variance-covariance structures of phenotypic observations (**Bernal-Vasquez et al., 2014**). Linear  
78 mixed models have been generally applied to analyze for GE interactions in plant breeding  
79 experiments (**Piepho, 1997; 1998; Piepho and Moehring, 2005; Smith et al., 2005, Crossa et**  
80 **al., 2006**).

81 The sheer large number of genotypes tested in early breeding stages means that  
82 experimental plots are large hence leading to local heterogeneity within experiments. To further  
83 improve prediction accuracies, different spatial adjustment models have been fronted to help deal  
84 with heterogeneity in experiments especially in these large early stage breeding trials (**Lado et**  
85 **al., 2013; Bernal-Vasquez et al., 2014; Piepho et al., 2015; Velazco et al., 2017; Ward et al.,**  
86 **2019**). Multidisciplinary teams are therefore continually working to improve the precision of  
87 measuring the phenotypes of the training populations to improve predictive ability of genomic  
88 selection in plant breeding, as summarized by **Ward et al. (2019)**. Several of these teams have  
89 shown that considering GE interactions and spatial adjustments contributed to increased

90 predictive ability. **Lado et al. (2013)** showed increased predictive ability with spatial adjustment  
91 of trial data in wheat. **Elias et al. (2018)** showed increase in predictive ability by about 3.4% in  
92 cassava following spatial adjustment. **Ward et al. (2019)** showed that correcting for spatial  
93 variation improved across location heritability by 25% but not prediction accuracy whereas  
94 correcting for GE interactions increased prediction accuracy by 9.8% in early breeding stage  
95 evaluation of wheat.

96 Whereas random GE interactions and spatial variation have been statistically proven to  
97 affect the precision of measuring the phenotype, the question that is not often answered is: how  
98 much of the variation observed from one experiment to the next is actually due to GE  
99 interactions? Although already a known problem in the statistical world (**Schlimmer and**  
100 **Granger, 1986**), with suggestions on data quality and cleaning (**Rahm and Do, 2000; Guillet**  
101 **and Hamilton, 2007**), experimental noise especially resulting from human error is the most  
102 difficult to correct using statistical methods. Such errors are mainly due to mislabeling, hence  
103 misclassification of study genotypes in different experiments which may also be presented as GE  
104 interaction in data. Despite this, there are currently very few studies addressing and reporting  
105 experimental noise in plants (**Biscarini et al., 2016**).

106 Sweetpotato is an important crop for food and nutrition security especially in sub-Saharan  
107 Africa (SSA). Having a complex, autohexaploid, genome ensured that genomics-assisted  
108 breeding has lagged behind for this crop. However, global efforts are now in place to ensure that  
109 new breeding tools such as genomic selection and marker-assisted selection are applied to  
110 benefit small-holder farmers and consumers of sweetpotato in SSA. In the current study we  
111 aimed to answer the following questions: i) how much mislabeling can be expected through  
112 different stages of population development for trialing within a breeding program, ii) what would  
113 be the effect of such mislabeling mistakes on marker-trait associations, iii) what are the effects of  
114 different proportions of mislabeling versus missingness using simulations on real data; iv) what  
115 would be the implications of such findings on designing a genomics-assisted breeding strategy  
116 for sweetpotato. We use two case studies and simulation based on data from some of the  
117 sweetpotato populations being used for genetic studies in preparation for deploying genomics-  
118 assisted breeding methods for sweetpotato improvement. All data are based on the global  
119 sweetpotato breeding program of the International Potato Center (CIP) through its various  
120 regional and sub-regional breeding platforms.

## 121 **Materials and Methods**

### 122 **Case Study 1: Genetic fidelity in the Mwanga Diversity Panel (MDP), a genetic study** 123 **breeding population**

#### 124 **Genetic materials**

125 The MDP population was developed from the sweetpotato breeding platform for east and central  
126 Africa of the International Potato Center (CIP). It is made up of a diallel cross among 16 parents  
127 from this breeding platform, coming from two gene pools (here A and B) separated by SSR  
128 markers (**David et al., 2018**). There are 64 families (8B by 8A crosses) each with 30 genotypes  
129 on average. Sweetpotato is mainly outcrossing, self-incompatible and heterozygous. Apart from  
130 the crossing step where propagation is by seed, sweetpotato is clonally propagated throughout  
131 the other stages of the breeding process. Therefore, each seed is potentially a different genotype.  
132 This population was established for the purpose of genetic studies in developing tools for genetic  
133 linkage in multi-family breeding populations, genome-wide association mapping and genomic  
134 selection for complex autopolyploid genomes.

135

### 136 **Population establishment and trialing**

137 The process of establishing this population is shown in the flowchart below (**Figure 1**). In  
138 summary, the crossing among parents was done in CIP-Uganda, where the seed inventory was  
139 established. Then seed was shipped to CIP-Kenya for *in vitro* germination, where the population  
140 is maintained *in vitro*. Sweetpotato, which almost behaves like a weed, is not *in vitro*-friendly  
141 hence requires constant multiplication and regeneration *in vitro*. Also, sweetpotato seed requires  
142 scarification protocols to germinate the seed which means that not all seed were successfully  
143 germinated the first time per family and new seed shipments were required for such families  
144 from CIP-Uganda to CIP-Kenya. After *in vitro* establishment, the population was then shipped  
145 back to CIP-Uganda for trialing. Since the population could not be established *in vitro* at the  
146 same time, *in vitro* plantlets were also shipped back to CIP-Uganda from CIP-Kenya in batches.

147 As each individual seed in sweetpotato is a potential new variety, the *in vitro* plantlets  
148 need to be grown in a greenhouse for cloning. Additionally, for experimentation, greenhouse  
149 plants need to be multiplied further through vines to have enough planting materials for  
150 experiments. The most important virus disease for sweetpotato is sweetpotato virus disease  
151 (SPVD), a complex caused by the synergistic interaction of *Sweet potato feathery mottle virus*  
152 and *Sweet potato chlorotic stunt virus*, transmitted by aphids and whiteflies, respectively (**Clark**  
153 **et al., 2012**). Since the CIP support platform in Uganda is located in Namulonge, a hotspot for  
154 SPVD, the vines cloned from greenhouses need to be multiplied in net tunnels that keep away  
155 the virus vectors to furnish virus-free planting materials for experiments. As part of quality  
156 control (QC) and quality assurance (QA), each net tunnel is planted with only genotypes from  
157 the same family. The vines for experimentation are taken from these net tunnels to the field  
158 experiments in Uganda. As part of QC/QA also, the two teams at CIP-Uganda and CIP-Kenya  
159 worked closely together. However, with a large population, barcodes were not used at all stages  
160 hence anticipation of some degree of human error.

### 161 **Molecular quality control for genetic fidelity through the various transfer stages**

162 During the first season of field trialing (2018), we randomly sampled about 5% of the population  
163 from *in vitro*, greenhouse and field experiments from one of the three field locations. Given that  
164 this is a breeding population developed from a diallel cross, our specific objectives were: i) to  
165 evaluate genetic fidelity following movement from *in vitro* to greenhouse and then to field; ii) to  
166 examine the level of mislabeling between and within families due to the population  
167 establishment process. The field and greenhouse sampling were done at the National Crop  
168 Resources Research Institute (NaCRRI) in Uganda, while *in vitro* sampling was carried out in  
169 the Biosciences eastern and central Africa - International Livestock Research Institute (BeCA-  
170 ILRI) Hub based in Nairobi, Kenya. The random sampling resulted in 13 out of the 64 families  
171 sampled, with an average of seven genotypes per family resulting in 94 samples hence three  
172 DNA plates were sent for genotyping (one each from *in vitro*, screen house and field). Although  
173 structure analysis does not require a high-density marker set, the complexity of the sweetpotato  
174 genome has ensured that a QC/QA low density marker set for routine use was still unavailable  
175 for sweetpotato breeding programs at CIP and African National Research Institutions (NARIs).  
176 Therefore, the three plates were genotyped at high density using Diversity Arrays Technology's  
177 (DArT) sequencing-based technology (DArTseq) implemented by the Integrated Genotyping  
178 Service and Support (IGSS), based at BeCA-ILRI in Nairobi. The high-density genotyping  
179 resulted in about 41,194 SNPs (**Supplementary Table 1**). Hard filtering of these based on

180 polymorphic information content (PIC)  $\geq 0.25$ , minimum allele frequency  $\geq 20\%$  and call rate  $\geq$   
181 90% left 11,622 SNPs that were used to develop a distance matrix and a phylogenetic tree. We  
182 used diploidized SNPs (SNPS without ploidy dosage information) for this study. The distance  
183 matrix and phylogenetic tree were generated using DARwin 6.0.21 (Perrier and Jacquemoud-  
184 Collet, 2006). Afterwards the clustering was examined based on positions on the tree and Sankey  
185 diagrams developed using the Alluvial package (Bojanowski and Edwards, 2016) in R.

## 187 Results of the QC experiment

188 The phylogenetic tree based on distance matrix (Figure 2) indicated expected clustering of same  
189 genotypes from *in vitro*, greenhouse and field of a larger percentage of the genotypes tested.  
190 However, an additional percentage of tested genotypes such as I28 (meaning *in vitro* 28) and its  
191 counterparts in the greenhouse and field, S28 and F28, respectively, did not cluster as expected  
192 indicating a level of mislabeling error (Supplementary Figure 1). The summary of the tree  
193 order, genotype names, phenotypically assigned families, families suggested by the genetic  
194 distance matrix, and the female and male parents of each phenotypically assigned family are  
195 shown in Supplementary Table 2. Analysis of the tree order indicated that 26 out of 94  
196 genotypes tested did not cluster as expected among *in vitro*, screen house and field samples  
197 thereby indicating about 27.7% labeling errors as the germplasm moved from *in vitro* to  
198 greenhouse and then to the field (Figure 3, Top). Analysis for between and within family  
199 mislabeling indicated that 64 out of the 282 tested genotypes did not belong to the phenotypic  
200 assigned families as indicated by genetic distance. This indicated that we had about 22.7%  
201 mislabeling error between and within families (Figure 3, Bottom).

## 203 Case Study 2. Quantitative trait loci-by-environment (QTL x E) analysis of a biparental 204 population

### 205 Genetic materials

206 A 315-progeny biparental population developed from a cross between Beauregard and Tanzania  
207 cultivars was evaluated in a multi-environment testing (MET) experiment in three countries:  
208 Peru, Ghana and Uganda. The two parents segregate for various traits of interest in sweetpotato  
209 such as  $\beta$ -carotene, starch, dry matter and yield related traits. Beauregard is a US-bred variety  
210 while Tanzania is an African farmer selected variety. Additional information about this  
211 population can be found in Pereira et al. (2019) and Gemenet et al. (2019; submitted).

### 212 Population establishment and trialing

213 The chain of trial establishment is presented in Figure 4. Crossing of the two parents, seed  
214 inventory, *in vitro* germination/maintenance, DNA extraction were all carried out in CIP-Peru.  
215 DNA was then shipped to the Genomic Science Laboratory (GSL) at the North Carolina State  
216 University (NCSU) for genotyping. Additionally, the *in vitro* plantlets were shipped to Ghana  
217 and Uganda. Greenhouse/net tunnel and field multiplication for trialing was carried out in Peru,  
218 Ghana and Uganda. After multiplication, six field experiments were carried out in three locations  
219 of Peru over two years (2016-2017), eight field experiments were carried out in three locations of  
220 Ghana over three years (2016-2018), and six field experiments were carried out in three locations  
221 of Uganda over two years (2017-2018). The trials in Peru were grown in Ica (latitude 14° 01'  
222 44.7" S, longitude 75° 44' 37.5" W), San Ramon (11°07'29"S, 75° 21' 25" W) and Pucallpa (8°  
223 23' 34.3" S, 74° 34' 57.4" W). In Uganda, the experiments were grown in Namulonge (0° 31'

224 17.99" N, 32° 36' 32.39" E), Serere (1° 29' 59.99" N, 33° 32' 59.99" E) and Kachwekano (1° 15'  
225 0" S, 29° 57' 0" E). In Ghana, the experiments were grown in Wenchi (7° 44' 0" N, 2° 6' 0" W),  
226 Fumesua (6° 42' 39.41"N, 1° 31' 2.03"W) and Nyankpala (9° 24' 0" N, 0° 58' 60" W). In Peru,  
227 the experiments in Ica were grown under two treatments: terminal drought (where irrigation was  
228 stopped at 70 days after transplanting (DAT)) and control (optimal) where irrigation was  
229 continued until harvest at 120 DAT. They are hereby abbreviated as Ica16D, Ica16C, Ica17D,  
230 Ica17C, indicating the location, year and treatment (D = drought; C = control) while the  
231 experiments in San Ramon and Pucallpa were grown only under optimal conditions in 2016,  
232 hereby abbreviated as SR16 and Puc16, respectively. In Uganda, all experiments were grown  
233 under optimal conditions and abbreviated as Nam16 and Nam17 for Namulonge in 2016 and  
234 2017 respectively, Ser16 and Ser17 for Serere in 2016 and 2017 respectively, and Kac16 and  
235 Kac17 for Kachwekano in 2016 and 2017 respectively. In Ghana, except for Nyankpala and  
236 Fumesua in 2016 both abbreviated as (Nya16 and Fum16, respectively), all other experiments  
237 were grown under terminal drought and control (optimal) treatments as described for Peru. They  
238 are abbreviated as Wen17D and Wen17C for Wenchi; Nya17D, Nya17C, Nya18D and Nya18C  
239 for Nyankpala 2017 and 2018 respectively (D = drought; C = control). Locations are shown in  
240 **Supplementary Figure 2.**

241 All the 315 genotyped progeny and parents were evaluated in Peru and Uganda. In  
242 Ghana, due to problems in multiplication, subsets ranging from 238-270 genotypes were  
243 evaluated in the eight experiments. The design was alpha lattice for all experiments in Peru,  
244 while randomized complete block design was used for experiments in Ghana and Uganda, each  
245 with at least two replications. Several yield- and quality-related traits were measured in these  
246 trials as described in **Pereira et al. (2019) and Gemenet et al. (2019; submitted)**. Data were  
247 collected per plot and converted to per hectare based on plot sizes per experiment. For the  
248 purposes of this case study, we used only the total storage root yield in tons per hectare (rytha),  
249 for two reasons: First this trait is easier to standardize measurement across the different trials  
250 without introducing too much bias. It is measured by weighing all storage roots per plot  
251 regardless of whether they are of marketable size or not. Separating roots into marketable and  
252 non-marketable size creates subjectivity as there is not an automated way and breeders in these  
253 regions use an estimation (i.e. anything less than 100g is non-marketable and vice-versa, which  
254 is subjective as the size is by visual estimation). Secondly, because storage root yield is our  
255 primary trait in addition to other quality attributes. Our objectives were: i) to calculate genetic  
256 correlations between pairs of environments; ii) to define mega-environments among the study  
257 test sites; iii) to map QTL within and between mega-environments; iv) to simulate different  
258 proportions of misclassification through permutation, and missingness to estimate their effects on  
259 QTL detection. The raw data used in this analysis is presented in **Supplementary Table 3.**

## 260 **Data analysis**

### 261 ***Phenotypic data***

262 To analyze the phenotypic data a two-stage multi-environment testing (MET) analysis approach  
263 was applied because different experimental designs were used across environments. In the first  
264 stage, single environment analyses were performed for all environments individually. A mixed  
265 model, taking into account the respective experimental design, was fitted to the phenotypic data  
266 (rytha trait). When plot coordinates were available, i.e. for the Peru trials, and when spatial field  
267 effects were significant, a spatial adjustment was incorporated in the mixed model. Filtering out

268 such significant spatial field effects reduces the residual noise so that the actual genetic signal  
269 becomes more pronounced. Genotype was considered as a fixed effect in these mixed models, so  
270 that best linear unbiased estimators (BLUEs) for the genotypic rytha means were obtained per  
271 environment. In the second stage, another mixed model was fitted to the table of estimated  
272 means. A weighting scheme based on the standard errors of the estimated genotype means per  
273 environment was used in this mixed model. This meant that, on average, more weight was given  
274 to trials with a higher heritability. Based on the genetic correlations between environments  
275 estimated using this fitted mixed model, mega-environments were determined. Finally, and in a  
276 similar way, a mixed model was fitted using only estimated genotype means from the  
277 environments belonging to a mega-environment, which was then used for inference about that  
278 specific mega-environment. The genetic variances of, and the genetic correlations between,  
279 environments belonging to a certain mega-environment were estimated, and best linear unbiased  
280 predictors (BLUPs) across that mega-environment. Also BLUEs across each mega-environment  
281 were estimated by fitting a similar mixed model taking genotype as a fixed effect. The BLUEs  
282 were then used in QTL mapping.

### 283 *Mapping of quantitative trait loci in mega-environments*

284 Genotyping of the mapping population was done using the GBSpoly protocol optimized for  
285 sweetpotato and described by **Wadl et al. (2018)**. Variant calling and dosage assigning for the  
286 hexaploid data was carried out as described in **Pereira et al. (2019) and Mollinari et al. (2019)**.  
287 QTL mapping was carried out based on the phased genetic linkage map (**Mollinari et al., 2019**)  
288 developed using the MAPpoly program (**Mollinari and Garcia, 2019**) optimized for polyploids.  
289 The genetic linkage map is available interactively at [https://gt4sp-genetic-  
290 map.shinyapps.io/bt\\_map/](https://gt4sp-genetic-map.shinyapps.io/bt_map/). The QTL analysis was done following the random effect model  
291 approach developed for polyploids and described by **Pereira et al. (2019)**. Analysis of QTL for  
292 single environments (SE) within mega environments (ME) was carried out based on the BLUEs  
293 from the first analytical stage of the two-stage mixed model analysis described above. QTL  
294 analysis at the ME level was carried out using BLUEs from the second analytical stage.

### 295 *Simulations to compare effects of missingness vs misclassification on QTL mapping*

296 In order to assess the detection rate of previously identified QTL, we performed QTL analyses  
297 with increasing proportion of randomly permuted individuals, to represent misclassified  
298 individuals (200 simulations each at 10%, 20%, 30%, 40% and 50%) using rytha and flesh color  
299 (FC) adjusted means. The simulations were based on data from Peru only whose quality had  
300 been upheld and for which QTL have already been reported (**Pereira et al., 2019; Gemenet et  
301 al., 2019; submitted**). Subsequently, we replaced the permuted individuals from each simulation  
302 with missing data and carried out new QTL analyses on these reduced samples to represent  
303 missingness. We chose to include flesh color together with rytha in the simulation study to  
304 represent both complex and simple traits respectively. As for the MET data above, QTL  
305 detection for the simulated data was carried out using QTLpoly software (**Pereira et al., 2019**)  
306 based on a forward search followed by a backward elimination with the respective pointwise  
307 thresholds of  $p < 0.01$  and  $0.001$ .

308

## 309 **Results**

### 310 *Single environment analysis*

311 Significant genotypic variation was observed among genotypes in all single environments (SE)  
312 as indicated by box plots of BLUEs in **Figure 5**. It is also evident from **Figure 5D** that  
313 considering spatial variation significantly improved correlation among single experiments in  
314 Peru which had a field map for rows and columns to allow for some spatial adjustments, as  
315 compared to Ghana and Uganda which did not. We dropped Kac17 and Nya16 from further  
316 analysis after preliminary analysis showed that the yields of these trials were extremely outlying,  
317 relatively low and high respectively, compared to the other trials in the same country.

### 318 *Multi-environment analysis*

319 At the second stage of the MET analysis, genotype distributions among BLUPs per experiment  
320 indicated genetic variation among the 18 experiments taken together, as indicated by boxplots  
321 based on BLUPs (**Figure 6A**). Additionally, correlations among BLUPs for the 18 environments  
322 indicated two clear MEs (**Figure 6B**). Only two of the experiments in Ghana showed some  
323 correlation with some experiments from Peru and Uganda, and these were not correlated with the  
324 other experiments in Ghana. ME1 was made up of five experiments from Ghana, while ME2 was  
325 made up from 11 experiments: six from Peru, three from Uganda and two from Ghana, though  
326 the two environments from Ghana were less correlated with the rest. For further analyses, we  
327 chose to use only nine experiments from Uganda and Peru which had higher correlations among  
328 BLUPs of ME2. Genetic correlations among pairs of environments were low-to-moderate  
329 ranging from  $r = 0.29$  to  $r = 0.65$  in ME1 (five Ghana environments; **Figure 6C**) and moderate-  
330 to-high, ranging from  $r = 0.37$  to  $r = 0.99$  in ME2 (nine environments from Peru and Uganda;  
331 **Figure 6D**).

### 332 *Quantitative trait loci (QTL) analysis*

333 Analyzing for QTL within the two mega-environments captured only one QTL for ME2 on  
334 linkage group (LG) 15 and no QTL for ME1 (**Figure 7A**). The QTL explained 16.7% of the  
335 observed variation in rytha across the ME2. Consequently, we analyzed for QTL for the single  
336 environments in ME2. Four distinct QTL were identified for SEs in ME2: one QTL was on LG  
337 3, one on LG 13 and two on LG15 (**Figure 7B; Table 1**). The second QTL on LG 15 was  
338 associated with Nam16, an environment in Uganda, while the rest of the QTL were associated  
339 with environments from Peru (**Table 1**). Individual QTL explained between 10.9 and 22.1% of  
340 the total observed variation for rytha (**Table 1**). Allelic effects analysis of parental haplotypes for  
341 the ME2 QTL on LG 15 indicated that Beauregard contributed two alleles that increased and  
342 three alleles that reduced rytha whereas Tanzania contributed three alleles each to the increase  
343 and reduction of rytha respectively (**Figure 7C**). Results also indicate that Tanzania contributed  
344 more to the increase in rytha in ME2, when compared to Beauregard (**Figure 7C**).

### 345 *Simulated data analysis for misclassification and missingness*

346 Simulations showed that the QTL on LG 15 previously identified by **Pereira et al. (2019)**, which  
347 also explained most of the phenotypic variance for rytha ( $h^2 = 20\%$ ), had its detection severely  
348 reduced as permuted individual proportions increased (**Table 2**). While this particular QTL was  
349 detected as much as 87.5% and 61.0% for 10% and 20% permuted data, respectively, only a 25%  
350 detection rate was observed for 30% permuted data. The noise generated by permutation was  
351 more prone to detection reduction when compared to analyses involving an increasing proportion  
352 of missing data. From 99.0% to 26.0% of detection rate was observed when 10% to 50% of data  
353 was missing. For the remaining minor QTL ( $h^2 = 8\sim 11\%$ ) previously identified (on LGs 8 and



354 13), detection rate was consistently low (<22.0%) even for 10% of missing data. On average,  
355 logarithm of p-values (LOP) was reduced from 4.49 to 1.35 for 10% to 50% permuted  
356 individuals, and from 5.00 to 2.61 for 10% to 50% missing data (**Supplementary Figure 3 and**  
357 **4**). Regarding the simple trait, FC, two highly significant QTL had been reported (**Gemenet et**  
358 **al., 2019; submitted**), on LG 3 and LG12. Using simulated data for QTL analysis, the QTL on  
359 LG 3 ( $h^2 = 54\%$ ) was consistently detected (>93.5%) regardless of the permutation or missing  
360 data proportions, while the QTL on LG 15 ( $h^2 = 29\%$ ) had its detection reduced to 72.0% at  
361 50% of permutation rate, where average LOP went down to 3.54 (**Supplementary Figure 5**).  
362 For missing data proportions, LOP was still consistently high (**Supplementary Figure 6**). Due  
363 to sampling error and lack of a genome-wide type-I error control, the number of false positives  
364 (putative QTL outside the support intervals of QTL previously reported) increased slightly as the  
365 proportion of missing data also increased in comparison to permuted data (**Table 3**).  
366

## 367 Discussion

### 368 Case Study 1: More than 20% pedigree error likely to affect future predictions based on 369 the MDP population negatively.

370 Experimental noise is detrimental to studies seeking to combine phenotypic and genomic data  
371 such as QTL analysis, genome-wide association mapping and genomic selection. In Case Study  
372 1, we found 27.7% error due to mislabeling from *in vitro*, screenhouse and field, and 22.7% error  
373 for mislabeling between and within families. The difference between the two errors is that the  
374 former just indicates whether a genotype retains the same label from *in vitro*, screen house and  
375 field regardless of family assignment, whereas the former looks at clustering based on family  
376 assignment. Effects of genotype mislabeling have been reported in humans, animals and plants.  
377 **Buyske et al. (2009)** showed that to retain the same power for marker-trait association in  
378 humans, a 39-fold more sample size was required if the mislabeling error was 5%. **Long et al.**  
379 **(1990)** observed that a 20% error in pedigree labeling resulted in 9.3, 3.2 and 12.4% reduction in  
380 genetic gain when using phenotypic BLUPs, for litter size, backfat and average daily gain,  
381 respectively, in pigs. This implies that the degree of sensitivity to pedigree errors are also  
382 influenced by trait architecture. Using an  $F_1$  population data previously analyzed for rytha  
383 (**Pereira et al., 2019**) and FC (**Gemenet et al., 2019; submitted**) in sweetpotato, we noticed that  
384 QTL detection was in fact more severely impacted for traits with lower heritability, like rytha,  
385 compared to high heritability traits like FC, when permuted data was simulated (**Table 2 and**  
386 **Supplementary Table 4**).

387 Mislabeling between families is also expected to have a negative effect on predictions  
388 especially in breeding programs where full-sib and half-sib family means are used in selection.  
389 In pigs, it was shown that 20% pedigree errors reduced genetic gain by 7.0, 2.5 and 7.5% in litter  
390 size, backfat and average daily gain, respectively, when using family means for selection (**Long**  
391 **et al., 1990**). In sweetpotato at CIP, most breeding programs are now adopting population hybrid  
392 breeding schemes which rely on progeny testing for selection. The current data does not allow  
393 estimation of the reduction in genetic gain expected when using either breeding values and  
394 family means for selection since we have not genotyped the whole population yet and also our  
395 experiment is not designed in a case-control manner. In plants, several prediction models were  
396 tried out to identify those that are relatively tolerant to pedigree errors using sugar beet. The  
397 study by **Biscarini et al. (2016)** indicated that local classification methods such as K-nearest  
398 neighbor and random forest tolerated the pedigree noise better compared to methods using global

399 data properties. Knowing the estimated pedigree errors in the current Case Study 1 is important  
400 as it will allow to explore such tolerant methods for breeding value prediction in future analyses  
401 and decisioning.

402 **Case Study 2: Lower genetic correlations and lack of significant QTL in some mega-**  
403 **environments indicate a level of phenotype misclassification in the mapping population.**

404 Differential QTL expression in relation to environmental variables is expected in MET analyses  
405 especially for complex quantitative traits (Boer et al., 2007). In our Case Study 2, we used  
406 mixed models to account for GE interactions as well as the associated genetic correlation  
407 structures and extended these to QTL mapping by matching the phenotypes to the respective  
408 genotypes as covariates. Following MET analysis, only one of the QTL identified in SEs of ME2  
409 was stable across the ME2. The QTL on LG 15 at position 4.19 cM can therefore be classified as  
410 a constitutive QTL for rytha in sweetpotato in the current genetic background whereas the other  
411 QTL on LG 3, 13 and LG 15 position 151.18 cM as adaptive QTL for those specific  
412 environments (Vargas et al., 2006). The only QTL of ME2 was mapped before in a combined  
413 analysis of all environments in Peru and possible candidate genes underlying this QTL are  
414 described in Pereira et al. (2019). Based on phenotypic data, the environments from Peru were  
415 all correlated possibly due to better data quality and the availability of field maps for spatial  
416 adjustments using rows and columns, when compared to the environments in Uganda and Ghana.  
417 These improved correlations in Peru were also extended to the QTL results where most of the  
418 significant QTL in SEs were identified in environments from Peru, with only one QTL being  
419 identified in one environment of Uganda. These results therefore confirm the findings of  
420 previous studies that spatial adjustment improves genetic correlations among environments  
421 (Lado et al., 2013; Elias et al., 2018; Ward et al., 2019). Although rytha, like many yield traits  
422 is quantitative and prone to GE interaction and QTL x E interaction (Boer et al., 2007; van  
423 Eeuwijk et al., 2010), we did not observe different QTL for the two MEs, rather, there was no  
424 significant QTL for ME1. Additionally, significant adaptive QTL were mainly identified for the  
425 environments from Peru. We therefore hypothesize that since population development and DNA  
426 extraction was carried out in Peru and no QC/QA was carried out for trials in Uganda or Ghana  
427 after shipping of *in vitro* genotypes, phenotype misclassification may have occurred in some  
428 environments. This would lead to phenotypes from some of the environments not matching  
429 entirely with the genotypic data, consequently resulting in lack of association between the trait  
430 and the markers, as demonstrated by simulations. This hypothesis is also supported by the fact  
431 that zero correlation was observed between some environments in Uganda and Ghana with the  
432 rest of the environments in the same country, at the single environment (SE) analysis step.  
433 Looking at the MEs defined at the second analytical stage, the genetic correlations among the  
434 environments in ME1 were lower than those observed among environments of ME2, even  
435 though ME2 contained environments from both Peru and Uganda while ME1 contained  
436 environments only from Ghana. Consequently, no QTL could be identified for ME1. Although a  
437 percentage of this can be attributed to GE interaction, we assume that the lack of correlation  
438 from one environment with the next could be a result of a certain degree of misclassification.  
439 Given that QTL detection in complex traits like rytha is difficult due to low trait heritability, we  
440 confirmed presence of misclassification by analyzing QTL in ME1 for a simple trait, flesh color,  
441 and the known high effect QTL already reported in (Gemenet et al., 2009; submitted) could not  
442 be captured either (data not shown). The QTL for ME2 could only explain 16.7% of the observed  
443 variation which is expected for complex traits like rytha as only QTL with relatively higher

444 effect can be captured in QTL tagging based on biparental populations, thereby leading to the  
445 concept of missing heritability (Crossa, 2012).

446  
447 **Phenotype misclassification affects QTL detection more than missingness, and the**  
448 **magnitude of effects is trait specific.**

449 Our simulation results showed that misclassification leads not only to decreased detection power,  
450 but also to QTL contribution underestimation. We also showed that especially for complex traits,  
451 phenotype misclassification had more detrimental effects on QTL detection when compared to  
452 missingness in data. Additionally, we found that although both misclassification and missingness  
453 affected QTL detection in simple traits as proportions increased, the reduction in QTL detection  
454 was much lower compared to quantitative traits. Missingness is a well-documented problem  
455 especially in human genetics where some phenotypes are difficult to measure in large enough  
456 populations for effective marker-trait association studies (Jiang et al. 2018). Missingness can  
457 lead to both type-I and type-II error in analysis and several methods have been proposed to  
458 mitigate against (Hormozdiari et al. 2016; Jiang et al. 2018; Chen et al. 2018). Plant breeding  
459 datasets are always unbalanced due to missingness. Similar to our results, Galli et al. (2018)  
460 showed that although missingness slightly reduced predictive ability as proportions of missing  
461 data increased, the selected fraction was not much affected in genomic prediction of maize  
462 hybrids. Contrastingly, misclassification has more dramatic effects even for simple traits. For  
463 example, even though the simulation data used in our study based on good quality phenotypic  
464 data from Peru indicates that misclassifications resulted in lower effects on QTL detection in  
465 simple traits, analyzing flesh color, a simple trait from ME1 above made up of environments  
466 from Ghana in which most misclassification and pedigree errors are suspected did not capture the  
467 high effect QTL already reported for the same trait in several other populations and  
468 environmental backgrounds. Therefore, addressing misclassification and pedigree errors requires  
469 proper attention in breeding trials to enhance increased genetic gains.

470  
471 **Implications for the sweetpotato breeding programs**

472 We have demonstrated the estimated level of pedigree error due to genotype misclassification by  
473 mislabeling and also demonstrated the likely consequences of such errors when combining the  
474 phenotypes with the respective genotypes using two case studies, and simulated data. Since  
475 breeding programs are moving more and more into genomic selection, genetic gain from such  
476 breeding activities will depend on the accuracy of predicting untested genotypes. Several  
477 methods have been proposed to help improve such prediction accuracy and could be adopted for  
478 sweetpotato breeding. Modeling of GE interaction and spatial adjustment using mixed models is  
479 one way to cater for environmental heterogeneity and improve such prediction accuracy (Piepho,  
480 1998; Burgueno et al., 2011; de los Campos et al., 2009; Crossa et al., 2010, 2011; Bernal-  
481 Vasquez et al., 2014). In this study we have observed that genetic fidelity due to proper labeling  
482 combined with spatial adjustment where necessary, improved the genetic signal for tagging QTL.  
483 Ability to tag QTL is important because linkage disequilibrium between markers and QTL is  
484 important in improving prediction accuracy in genomic selection (Nakaya and Isobe, 2012;  
485 Spindel et al., 2016). Additionally, use of multi-trait, multi-environment prediction has been  
486 shown to improve prediction accuracy (Covarrubias-Pazaran et al., 2018; Sun et al., 2017;  
487 Mitchel et al., 2019) and genetic gain from genomics-assisted breeding. Such multi-trait  
488 analyses, also known as multivariate analyses, take advantage of the genetic correlations between

489 simple secondary traits and complex yield traits included in both training and prediction  
490 populations to improve prediction accuracy of the complex trait.

491 In case of misclassification and pedigree errors, a few statistical approaches have been  
492 explored to improve prediction accuracy such as using less sensitive prediction methods  
493 (Biscarini et al., 2016) and the use of realized relationship matrices to correct pedigree errors  
494 (Munoz et al., 2013). These can be adopted in sweetpotato especially in the case of the MDP  
495 population described in Case Study 1 to improve prediction accuracy of future studies. However,  
496 the use of improved statistical analytic methods is a reactionary approach to improving  
497 prediction accuracy and marker-trait associations, and its benefits may be limited depending on  
498 how much human error is present in a given trial. To better take advantage of the advances in  
499 genomics-assisted breeding, sweetpotato breeding would make faster genetic gains from  
500 adopting improved breeding process and plot management practices to avoid both pedigree  
501 errors due to genotype misclassification and experimental errors. This would require putting in  
502 place and applying next generation data management and analytical decision support tools for  
503 participating sweetpotato breeding programs (Rathore et al., 2018). We propose that the  
504 sweetpotato breeding process be mapped out and documented in each breeding program.  
505 Additionally, standard operating procedures (SOPs) should be documented and implemented at  
506 each stage of the breeding process such as: crossing and seed inventory, experimental designs  
507 and trial establishment, phenotyping and digitalized data capture, standard trait ontologies, data  
508 checks and quality metrics, meta-data recording, sample tracking and genotyping workflows,  
509 marker-assisted selection and genomic selection. Additionally, barcoding and QC/QA of  
510 breeding and trialing populations should be adopted and applied routinely.

#### 511 **Data Availability**

512 The SNP data used in Case study 1 and the phenotypic data used in Case study 2 are submitted  
513 together with this manuscript, as Supplementary Table 1 and Supplementary Table 2,  
514 respectively. The genetic linkage map used in QTL mapping can be interactively accessed at  
515 ([https://gt4sp-genetic-map.shinyapps.io/bt\\_map/](https://gt4sp-genetic-map.shinyapps.io/bt_map/)).

#### 516 **Author Contributions**

517 DG, MK, RS, OU, JS, EC, WG, BY, CY, RM planned and carried out field and laboratory  
518 experiments, DG, BB, GP carried out data analysis, DG wrote the manuscript. All authors read  
519 and approved the manuscript.

#### 520 **Funding**

521 The research was supported by a Bill & Melinda Gates Foundation grant (Grant number  
522 OPP1052983), as part of the Consultative Group on International Agricultural Research  
523 (CGIAR)-Research Program on Roots, Tubers and Bananas (RTB) which is supported by  
524 CGIAR Fund Donors (<http://www.cgiar.org/about-us/our-funders/>).

#### 525 **Acknowledgements**

526 The authors wish to acknowledge the scientific and technical teams at CIP-Peru, CIP-Uganda  
527 and CIP-Ghana for carrying out field experiments and the team at CIP-Kenya for carrying out  
528 laboratory analyses. Additionally, the authors acknowledge the Genomic Tools for Sweetpotato  
529 Improvement project (GT4SP) members for indirect contribution towards the manuscript.

530 **Conflict of Interest**

531 The authors declare no conflict of interest.

532

533 **References**

- 534 Allard, R. W., and Bradshaw, A. D. (1964). Implications of genotype–environment interactions  
535 in applied plant breeding. *Crop Sci.* 4, 503–508.
- 536 Baye, T. M., Abebe, T., and Wilke, R. A., (2011). Genotype–environment interactions and their  
537 translational implications. *Per Med.* 8(1), 59–70.
- 538 Bernal-Vasquez, A-M., Möhring, J., Schmidt, M., Schönleben, M., Schön, C-C., and Piepho, H-  
539 P. (2014). The importance of phenotypic data analysis for genomic prediction - a case  
540 study comparing different spatial models in rye. *BMC Genomics* 15, 646.
- 541 Biscarini, F., Nazzicari, N., Broccanello, C., Stevanato, P., and Marini S. (2016). “Noisy beets”:  
542 impact of phenotyping errors on genomic predictions for binary traits in *Beta vulgaris*.  
543 *Plant Methods* 12:36.
- 544 Boer, M. P., Wright, D., Feng, L. Z., Podlich, D.W., Luo, L., Cooper, M., van Eeuwijk, F. A.  
545 (2007). A mixed-model quantitative trait loci (QTL) analysis for multiple-environment  
546 trial data using environmental covariables for QTL-by-environment interactions, with an  
547 example in maize. *Genetics* 177, 1801–1813.
- 548 Bojanowski, M., and Edwards, R. (2006). Alluvial R package.  
549 <https://github.com/mbojan/alluvial>.
- 550 Burgueño, J., Crossa, J., Miguel Cotes, J., San Vicente, F., Das, B. (2011). Prediction assessment  
551 of linear mixed models for multi-environment trials. *Crop Sci.* 51, 944-954.
- 552 Buyske, S., Yang, G., Matise, T. C., Gordon, D. (2009). When a case is not a case: effects of  
553 phenotype misclassification on power and sample size requirements for the transmission  
554 disequilibrium test with affected child trios. *Human Hered.* 67(4), 287–92.
- 555 Chen, Y., Peloso G. M., and Dupuis, J. (2018). Evaluation of a phenotype imputation approach  
556 using GAW20 simulated data. *BMC Proceedings* 12(9):56.  
557 <https://doi.org/10.1186/s12919-018-0134-9>.
- 558 Clark C. A., Davis, J. A., Abad, J. A., Cuellar, W.J., Fuentes, S., Kreuze, J. F., Gibson, R. W.,  
559 Mukasa, S. B., Tugume, A. K., Tairo, F. D., and Valkonen J. P. T. (2012). Sweetpotato  
560 viruses: 15 years of progress on understanding and managing complex diseases. *Plant*  
561 *Disease* 96:168-185.
- 562 Covarrubias-Pazarán, G., Schlautman, B., Diaz-Garcia. L., Grygleski, E., Polashock. J., et al.  
563 (2018). Multivariate GBLUP improves accuracy of genomic selection for yield and fruit  
564 weight in biparental populations of *Vaccinium macrocarpon* Ait. *Front. Plant Sci.* 9,  
565 1310.
- 566 Crossa, J. (2012). From Genotype × Environment Interaction to Gene × Environment Interaction.  
567 *Curr. Genomics* 13, 225-244.
- 568 Crossa, J. Pérez, P. de los Campos, G. Mahuku, G. Dreisigacker, S. Magorokosho, C. (2011).  
569 Genomic selection and prediction in plant breeding. *J. Crop Improve.* 25, 239-261.
- 570 Crossa, J., Burgueño, P. L., Cornelius, G., McLaren, R., Trethowan et al., (2006) Modeling  
571 genotype x environment interaction using additive genetic covariances of relatives for  
572 predicting breeding values of wheat genotypes. *Crop Sci.* 46: 1722–1733.

- 573 Crossa, J., de los Campos, G., Pérez, P., Gianola, D., Dreisigacker, S., Burgueño, J., Araus, J. L.,  
574 Makumbi, D., Yan, J., Singh, R., Arief, V., Banziger, M., Braun, H.-J. (2010). Prediction  
575 of genetic values of quantitative traits in plant breeding using pedigree and molecular  
576 markers. *Genetics* 186, 1-12.
- 577 David, M.C., Diaz, F.C., Mwangi, R.O.M., Tumwegamire, S., Mansilla, R.C., and Grüneberg  
578 W.J. (2018). Gene pool subdivision of east African sweetpotato parental material. *Crop*  
579 *Sci.* 58:2302–2314.
- 580 de los Campos, G., Naya, H., Gianola, D., Crossa, J., Legarra, A., Manfredi, E., Weigel, K.,  
581 Cotes, J. M. (2009). Predicting quantitative traits with regression models for dense  
582 molecular markers and pedigree. *Genetics* 182, 375-385.
- 583 Elias, A. A., Rabbi, I., Kulakow, P., and Jannink, J.-L. (2018). Improving genomic prediction in  
584 cassava field experiments using spatial analysis. *G3: Genes, Genomes, Genet.* 8, 53–62.  
585 doi:10.1534/g3.117.300323.
- 586 Elshire, R. J., Glaubitz, J. C., Sun, Q., Poland, J. A., Kawamoto, K. et al., (2011). A robust,  
587 simple genotyping-by-sequencing (GBS) approach for high diversity species. *PLoS ONE*  
588 6, e19379.
- 589 Galli, G., Lyra, D.H., Alves, F.C., Granato, S. C., Fritsche-Neto R., et al., (2018). Impact of  
590 phenotypic correction method and missing phenotypic data on genomic prediction of  
591 maize hybrids. *Crop Sci.* 58: 1481–1491.
- 592 Gemenet, D. C., Pereira, G. D. S., De Boeck, B., Wood, J.C., Mollinari, M., Olukolu, B. A.,  
593 Diaz, F., Mosquera, V., Ssali, R. T., David, M., Kitavi, M. N., Burgos, G., Zum Felde, T.,  
594 Ghislain, M., Carey, E., Swanckaert, J., Coin, L. J. M., Fei, Z., Hamilton, J. P., Yada, B.,  
595 Yendo, G. C., Zeng, Z.-B., Mwangi, R. O. M., Khan, A., Gruneberg, W. J., Buell, C. R.  
596 (2019). Quantitative trait loci and differential gene expression analyses reveal the genetic  
597 basis for negatively-associated  $\beta$ -carotene and starch content in hexaploid sweetpotato  
598 [*Ipomoea batatas* (L.) Lam.]. **Submitted**
- 599 Génard, M., Lescourret, F., Bevacqua, D., and Boivin T. (2017). Genotype-by environment  
600 interactions emerge from simple assemblages of mathematical functions in ecological  
601 models. *Front. Ecol. Evol.* 5, 13.
- 602 Guillet, F., and Hamilton, H. J. (2007). Quality measures in data mining, vol. 43. Heidelberg:  
603 Springer; 2007.
- 604 Hormozdiari, F., Kang, E. Y., Bilow, M., Ben-David, E., Vulpe, C., McLachlan, S., Lusi, A. J.,  
605 Han, B., and Eskin, E. (2016). Imputing phenotypes for genome-wide association studies.  
606 *The Amer. J. Human Genet.* 99: 89-103.
- 607 Jiang, Y., Chen, S., McGuire, D., Chen, F., Liu, M., Iacono, W. G., et al., (2018). Proper  
608 conditional analysis in the presence of missing data: Application to large scale meta-  
609 analysis of tobacco use phenotypes. *PLoS Genet.* 14(7): e1007452.
- 610 Lado, B., Matus, I., Rodríguez, A., Inostroza, L., Poland, J., Belzile, F., del Pozo, A., Quincke,  
611 M., Castro, M., and von Zitzewitz, J (2013). Increased genomic prediction accuracy in  
612 wheat breeding through spatial adjustment of field trial data. *G3: Genes, Genomes,*  
613 *Genetics* 3:2105-2114.
- 614 Long, T., Johnson, R., Keele, J. (1990). Effects of errors in pedigree on three methods of  
615 estimating breeding value for litter size, backfat and average daily gain in swine. *J. Anim.*  
616 *Sci.* 68(12), 4069–78.
- 617 Meuwissen, T. H. E., Hayes, B. J., and Goddard, M. E. (2001). Prediction of total genetic values  
618 using genome-wide dense marker maps. *Genetics* 157, 1819-1829.

- 619 Michel, S., Löschenberger, F., Ametz, C., Pachler, B., Sparry, E., and Bürstmayr, H. (2019).  
620 Simultaneous selection for grain yield and protein content in genomics-assisted wheat  
621 breeding. *Theor. Appl. Genet.* 132, 1745–1760.
- 622 Mollinari, M., and Garcia A. A. F. (2019). Linkage analysis and haplotype phasing in  
623 experimental autopolyploid populations with high ploidy level using hidden Markov  
624 models. *G3: Genes, Genomes, Genetics*. <https://doi.org/10.1534/g3.119.400378>
- 625 Mollinari, M., Olokulu, B., Pereira, G. D. S., Khan, A., Gemenet, D. C., Yencho, C., and Zeng  
626 Z-B (2019). Unraveling the hexaploid sweetpotato inheritance using ultra-dense  
627 multilocus mapping. *BioRxiv Preprint*. doi: <https://doi.org/10.1101/689638>.
- 628 Munoz, P. R., Resende Jr., M. F. R., Huber, D. A., Quesada, T., Resende, M. D. V., Neale, D. B.,  
629 Wegrzyn, J. L., Kirst, M., and Peter, G. F. (2013). Genomic relationship matrix for  
630 correcting pedigree errors in breeding populations: Impact on genetic parameters and  
631 genomic selection accuracy. *Crop Sci.* 53:1115–11.
- 632 Nakaya, A., and Isobe, N. (2012). Will genomic selection be a practical method for plant  
633 breeding? *Ann. Bot.* 110(6), 1303-1316.
- 634 Osei, M. K., Annor, B., Adjebeng-Danquah, J., Danquah, A., Danquah, E., Blay E., and Adu-  
635 Dapaah, H. (2018). Genotype × environment interaction: A prerequisite for tomato  
636 variety development. <http://dx.doi.org/10.5772/intechopen.76011>.
- 637 Pereira, G. D. S., Gemenet, D. C., Mollinari, M., Olukolu, B. A., Diaz, F., Mosquera, V.,  
638 Gruneberg, W. J., Khan, A., Yencho, G. C., Zeng, Z-B. (2019). Multiple QTL mapping in  
639 autopolyploids: a random-effect model approach with application in a hexaploid  
640 sweetpotato full-sib population. *BioRxiv Preprint*. doi: <https://doi.org/10.1101/622951>.
- 641 Perrier, X., and Jacquemoud-Collet, J. P. (2006). DARwin Software.  
642 <http://darwin.cirad.fr/darwin>.
- 643 Piepho, H. P., and Mohring, J. (2005). Best linear unbiased prediction of cultivar effects for  
644 subdivided target regions. *Crop Sci.* 45, 1151-1159.
- 645 Piepho, H.-P. (1997). Analyzing genotype-environment data by mixed models with  
646 multiplicative terms. *Biometrics* 53, 761-767.
- 647 Piepho, H.-P. (1998). Empirical best linear unbiased prediction in cultivar trials using factor  
648 analytic variance-covariance structures. *Theor. Appl. Genet.* 97, 195-201.
- 649 Piepho, H.-P., Möhring, J., Pflugfelder, M., Hermann, W., and Williams, E.R. (2015). Problems  
650 in parameter estimation for power and AR(1) models of spatial correlation in designed  
651 field experiments. *Commun. Biom. Crop Sci.* 10, 3–16.
- 652 Rahm, E., and Do, H. H. (200). Data cleaning: problems and current approaches. *IEEE Data Eng*  
653 *Bull.* 23(4), 3–13.
- 654 Rathore, A., Singh, V. K., Pandey, S. K., Rao, C. S., Thakur, V., Pandey, M. K., Kumar, V. A.,  
655 and Das R. R. (2018). Current Status and Future Prospects of Next-Generation Data  
656 Management and Analytical Decision Support Tools for Enhancing Genetic Gains in  
657 Crops. *Adv. Biochem. Eng. Biotechnol.* 164, 277–292.
- 658 Schlimmer, J. C., Granger, R. H. Jr. (1986). Incremental learning from noisy data. *Mach. Learn.*  
659 1(3), 317–54.
- 660 Smith, A. B., Cullis, B. R., and Thompson, R. (2005). The analysis of crop cultivar breeding and  
661 evaluation trials: An overview of current mixed model approaches. *J. Agric. Sci.* 143, 1-  
662 14.

- 663 Spindel, J. E., Begum, H., Akdemir, D., Collard, B., Redoña, E., Jannink, J-L., and McCouch, S.  
 664 (2016). Genome-wide prediction models that incorporate de novo GWAS are a powerful  
 665 new tool for tropical rice improvement. *Heredity* 116, 395–408.
- 666 Sun, J., Rutkoski, J. E., Poland, J. A., Crossa, J., Jannink, J-L., and Sorrells, M. E. (2017).  
 667 Multitrait, random regression, or simple repeatability model in high throughput  
 668 phenotyping data improve genomic prediction for wheat grain yield. *The Plant Genome*  
 669 10(2) doi: 10.3835/plantgenome2016.11.0111.
- 670 van Eeuwijk, F. A., Bink, M., Chenu, K., Chapman, S. C. (2010). Detection and use of QTL for  
 671 complex traits in multiple environments. *Curr. Opin. Plant Biol.* 13, 193–205.
- 672 Vargas, M., van Eeuwijk, F. A., Crossa, J., Ribaut, J.M. (2006). Mapping QTLs and QTL ×  
 673 environment interaction for CIMMYT maize drought stress program using factorial  
 674 regression and partial least squares methods. *Theor. Appl. Genet.* 112, 1009-1023.
- 675 Velazco J. G., Rodriguez- Alvarez, M. X., Boer, M. P., Jordan, D. R., Eilers, P. H. C., Malosetti,  
 676 M., van Eeuwijk, F. A. (2017). Modelling spatial trends in sorghum breeding field trials  
 677 using a two-dimensional P-spline mixed model. *Theor. Appl. Genet.* 130, 1375–1392.
- 678 Wadl, P. A., Olukolu, B. A., Branham, S. E., Jarret, R. L., Yench, G. C., et al., (2018). Genetic  
 679 diversity and population structure of the USDA sweetpotato (*Ipomoea batatas*)  
 680 germplasm collections using GBSpoly. *Frontiers in Plant Science* 9, 1–13.
- 681 Ward, B. P., Brown-Guedira, G., Tyagi, P., Kolb, F. L., Van Sanford, D. A., Sneller, C. H., and  
 682 Griffey, C. A. (2019). Multienvironment and multitrait genomic selection models in  
 683 unbalanced early-generation wheat yield trials. *Crop Sci.* 59, 491–507.

684

## 685 Tables

686 **Table 1.** Summary of QTL analysis results from a multi-environment testing (MET) experiment  
 687 across 18 environments of Peru, Ghana and Uganda

| QTL      | LG        | Experiment | Posn<br>(cM) | LSI<br>(cM) | USI<br>(cM)  | p-Values        | $h^2$       |
|----------|-----------|------------|--------------|-------------|--------------|-----------------|-------------|
| 1        | 3         | Ica16C     | 3.10         | 0.00        | 37.44        | 2.00E-05        | 22.1        |
| 2        | 13        | Ica16C     | 90.20        | 73.91       | 138          | 5.08E-04        | 10.9        |
| 3        | 13        | Ica17C     | 106.20       | 87.35       | 130.30       | 1.51E-04        | 15.9        |
| 4        | 15        | Ica16C     | 4.90         | 0.00        | 36.02        | 4.16E-05        | 11.5        |
| 5        | 15        | Ica16D     | 4.90         | 0.00        | 8.02         | 4.69E-05        | 18.2        |
| 6        | 15        | Puc16      | 6.26         | 0.00        | 43.10        | 1.12E-04        | 14.3        |
| 7        | 15        | Nam16      | 151.18       | 97.15       | 159.00       | 5.87E-05        | 13.2        |
| <b>8</b> | <b>15</b> | <b>ME2</b> | <b>4.19</b>  | <b>0.00</b> | <b>36.02</b> | <b>8.16E-05</b> | <b>16.7</b> |

688 QTL=quantitative trait loci, LG=linkage group, posn=position, LSI=lower support interval,  
 689 USI=Upper support interval,  $h^2$ =heritability of the QTL, i.e. % variation explained by QTL.

690

691

692

693

694



695  
696  
697  
698  
699  
700  
701  
702  
703  
704  
705  
706  
707  
708  
709  
710  
711  
712  
713  
714

**Table 2.** Number of putative QTL in different proportions of missing data and permuted individuals. Each proportion was simulated 200 times. A QTL was considered ‘true’ if located within support intervals of previously identified QTL, and ‘false’ otherwise.

| Trait | L<br>G | QTL    | Missing data |       |       |       |       | Permutation |       |      |       |      |
|-------|--------|--------|--------------|-------|-------|-------|-------|-------------|-------|------|-------|------|
|       |        |        | 10           | 20    | 30    | 40    | 50    | 10          | 20    | 30   | 40    | 50   |
| rytha | 8      | False  | 4            | 14    | 4     | 4     | 4     | 6           | 2     | 3    | 6     | 0    |
|       |        | True   | 35           | 33    | 17    | 22    | 17    | 31          | 29    | 13   | 6     | 9    |
|       |        | % True | 17.5         | 16.5  | 8.5   | 11.0  | 8.5   | 15.5        | 14.5  | 6.5  | 3.0   | 4.5  |
|       | 13     | False  | 3            | 6     | 4     | 9     | 4     | 4           | 4     | 1    | 3     | 2    |
|       |        | True   | 44           | 43    | 29    | 20    | 22    | 33          | 26    | 11   | 4     | 9    |
|       |        | % True | 22.0         | 21.5  | 14.5  | 10.0  | 11.0  | 16.5        | 13.0  | 5.5  | 2.0   | 4.5  |
|       | 15     | False  | 1            | 20    | 16    | 25    | 19    | 9           | 22    | 25   | 23    | 6    |
|       |        | True   | 198          | 167   | 141   | 104   | 52    | 175         | 122   | 50   | 24    | 15   |
|       |        | % True | 99.0         | 83.5  | 70.5  | 52.0  | 26.0  | 87.5        | 61.0  | 25.0 | 12.0  | 7.5  |
| FC    | 3      | False  | 5            | 5     | 6     | 11    | 14    | 11          | 7     | 12   | 10    | 8    |
|       |        | True   | 200          | 200   | 200   | 200   | 200   | 200         | 200   | 198  | 200   | 187  |
|       |        | % True | 100.0        | 100.0 | 100.0 | 100.0 | 100.0 | 100.0       | 100.0 | 99.0 | 100.0 | 93.5 |
|       | 12     | False  | 0            | 1     | 1     | 6     | 7     | 0           | 5     | 7    | 1     | 6    |
|       |        | True   | 200          | 199   | 200   | 196   | 199   | 200         | 197   | 197  | 183   | 144  |
|       |        | % True | 100.0        | 99.5  | 100.0 | 98.0  | 99.5  | 100.0       | 98.5  | 98.5 | 91.5  | 72.0 |

LG=linkage group, QTL=quantitative trait loci, rytha=total root yield in tons per hectare, FC=flesh color

715  
716  
717  
718  
719  
720  
721  
722

723 **Table 3.** Number of new putative QTL (regarded as false positives) per linkage group detected in  
724 different proportions of missing data and permuted individuals. Each proportion was simulated  
725 200 times.

| Trait | Simulation  | Prop (%) | Linkage groups |    |    |    |    |   |    |    |    |    |    |    |    |    |    | Total |
|-------|-------------|----------|----------------|----|----|----|----|---|----|----|----|----|----|----|----|----|----|-------|
|       |             |          | 1              | 2  | 3  | 4  | 5  | 6 | 7  | 8  | 9  | 10 | 11 | 12 | 13 | 14 | 15 |       |
| rytha | Missing     | 10       | 72             | 1  | 32 | 3  | 5  | 0 | 2  | 4  | 0  | 0  | 10 | 10 | 3  | 1  | 1  | 144   |
|       |             | 20       | 59             | 3  | 50 | 7  | 2  | 2 | 1  | 14 | 3  | 0  | 18 | 17 | 6  | 13 | 20 | 215   |
|       |             | 30       | 56             | 8  | 39 | 11 | 5  | 6 | 5  | 4  | 2  | 0  | 12 | 24 | 4  | 6  | 16 | 198   |
|       |             | 40       | 52             | 5  | 37 | 15 | 4  | 1 | 11 | 4  | 9  | 3  | 16 | 23 | 9  | 6  | 25 | 220   |
|       |             | 50       | 49             | 8  | 27 | 18 | 1  | 7 | 14 | 4  | 16 | 2  | 18 | 20 | 4  | 11 | 19 | 218   |
|       | Permutation | 10       | 62             | 2  | 34 | 5  | 5  | 1 | 2  | 6  | 0  | 1  | 14 | 16 | 4  | 3  | 9  | 164   |
|       |             | 20       | 42             | 1  | 24 | 7  | 3  | 3 | 3  | 2  | 3  | 1  | 19 | 17 | 4  | 9  | 22 | 160   |
|       |             | 30       | 31             | 5  | 20 | 5  | 4  | 4 | 2  | 3  | 3  | 2  | 12 | 16 | 1  | 2  | 25 | 135   |
|       |             | 40       | 21             | 2  | 17 | 7  | 4  | 5 | 3  | 6  | 7  | 4  | 7  | 7  | 3  | 7  | 23 | 123   |
|       |             | 50       | 13             | 5  | 16 | 6  | 3  | 6 | 8  | 0  | 2  | 6  | 10 | 14 | 2  | 11 | 6  | 108   |
| FC    | Missing     | 10       | 7              | 2  | 5  | 23 | 0  | 1 | 1  | 0  | 0  | 1  | 0  | 0  | 2  | 6  | 4  | 52    |
|       |             | 20       | 13             | 11 | 5  | 19 | 0  | 0 | 3  | 1  | 2  | 6  | 0  | 1  | 9  | 10 | 1  | 81    |
|       |             | 30       | 11             | 9  | 6  | 15 | 5  | 2 | 7  | 7  | 4  | 2  | 0  | 1  | 6  | 15 | 8  | 98    |
|       |             | 40       | 16             | 19 | 11 | 29 | 7  | 4 | 13 | 4  | 6  | 8  | 3  | 6  | 17 | 16 | 11 | 170   |
|       |             | 50       | 13             | 11 | 14 | 31 | 13 | 5 | 11 | 5  | 11 | 8  | 5  | 7  | 14 | 11 | 14 | 173   |
|       | Permutation | 10       | 10             | 10 | 2  | 11 | 2  | 1 | 3  | 2  | 2  | 12 | 1  | 0  | 4  | 12 | 4  | 76    |
|       |             | 20       | 12             | 17 | 3  | 19 | 7  | 3 | 4  | 3  | 3  | 8  | 1  | 5  | 10 | 11 | 6  | 112   |
|       |             | 30       | 10             | 8  | 12 | 14 | 11 | 3 | 7  | 2  | 5  | 5  | 7  | 7  | 12 | 5  | 7  | 115   |
|       |             | 40       | 11             | 8  | 8  | 12 | 6  | 4 | 7  | 4  | 7  | 7  | 4  | 1  | 18 | 5  | 4  | 106   |
|       |             | 50       | 16             | 11 | 8  | 10 | 4  | 3 | 6  | 3  | 7  | 3  | 6  | 6  | 10 | 8  | 8  | 109   |

726 Prop=proportion, rytha=total root yield per hectare, FC=flesh color.

727

## 728 Figure Captions

729 **Figure 1.** Flow chart of population development of the Mwanga Diversity Panel (MDP)  
730 population from crossing to field evaluation

731 **Figure 2.** Unweighted neighbor-joining tree based on dissimilarities of 94 genotypes replicated  
732 from field, screenhouse and *in vitro* (hence 282 samples in total) using 11,622 DArTseq SNP  
733 markers. Green dots indicate samples from field, black dots indicate samples from screenhouse,  
734 and red dots indicate samples from *in vitro*.

735 **Figure 3.** Top: A Sankey diagram showing mislabeling from *in vitro*, screenhouse and field of  
736 94 randomly selected genotypes of the MDP population based on the tree order of the genetic  
737 distance matrix using 11,622 SNP markers. The y-axis indicates the cluster order of the  
738 genotypes from the phylogenetic tree. The purple color indicates those that are mislabeled while  
739 the pink color indicates genotypes which cluster well from *in vitro*, screenhouse and field.  
740 Bottom: A Sankey diagram showing mislabeling among different phenotypically assigned  
741 families (Family PA) and clustering based on genetic distance matrix (Family GA). The mixed  
742 families Mixed1, Mixed2 and Mixed3 were assigned when more than two families appeared on  
743 the same clade of the phylogenetic tree. The y-axis represents the family names. The purple color  
744 represents misplacement within families, the pink color represents agreement in family  
745 assignment between phenotypic and genetic distance.

746 **Figure 4.** Chain of events from crossing to trial establishment in three countries with  
747 sweetpotato breeding platforms of the International Potato Center (CIP).

748 **Figure 5.** Boxplots (A, B, C) and correlation charts (D, E, F) among best linear unbiased  
749 estimators (BLUEs) for total storage root yield measured in 18 single experiments in Peru,  
750 Uganda and Ghana.

751 **Figure 6.** Boxplots (A), correlations and mega-environments (ME) among best linear unbiased  
752 predictors (BLUPs; B) and genetic correlations within ME1 (C) and ME2 (D) from MET  
753 analysis of 18 experiments from Peru, Uganda and Ghana.

754 **Figure 7.** QTL plots for mega environments (ME1 and ME2; A) and single environments  
755 included in ME2 (experiments from Peru and Uganda; B). Allelic effects of parental haplotypes  
756 to the observed variation explained by the significant QTL on LG 15 (C)

757

## 758 **Supplemental Figures Captions**

759 **Supplementary Figure 1.** A zoomed out phylogenetic tree (from Figure 1), showing the  
760 clustering of some genotypes selected from *in vitro* (red with prefix I), screenhouse (black with  
761 prefix S) and field (blue with prefix F). The majority of genotypes are consistently clustered.  
762 However, some of them are not e.g. I28 which is clustering differently from S28 and F28.

763 **Supplementary Figure 2.** A map showing the experimental locations in Peru, Ghana and  
764 Uganda used in the evaluation of a biparental mapping population.

765 **Supplementary Figure 3.** QTL mapping for increasing proportion of permuted individuals (10,  
766 20, 30, 40 and 50%) from the non-permuted, original data (0%) for rytha (Pereira et al. 2019).  
767 Colored lines are their respective LOP average for 200 simulations each.

768 **Supplementary Figure 4.** QTL mapping for increasing proportion of missing data (10, 20, 30,  
769 40 and 50%) from the non-missing, original data (0%) for rytha (Pereira et al. 2019). Colored  
770 lines are their respective LOP average for 200 simulations each.

771 **Supplementary Figure 5.** QTL mapping for increasing proportion of permuted individuals (10,  
772 20, 30, 40 and 50%) from the non-permuted, original data (0%) for FC (Gemenet et al. 2019).  
773 Colored lines are their respective LOP average for 200 simulations each.

774 **Supplementary Figure 6.** QTL mapping for increasing proportion of missing data (10, 20, 30,  
775 40 and 50%) from the non-missing, original data (0%) for FC (Gemenet et al. 2019). Colored  
776 lines are their respective LOP average for 200 simulations each.

777

#### 778 **Supplementary Data Captions**

779 **Supplementary Table 1.** DArTseq single nucleotide polymorphism markers used in Case Study  
780 1

781 **Supplementary Table 2.** Genotype list and family assignments of genotypes used in Case Study  
782 1

783 **Supplementary Table 3.** Raw data from field experiments in Peru, Ghana and Uganda  
784 measured on a biparental mapping population used in Case Study 2.

785

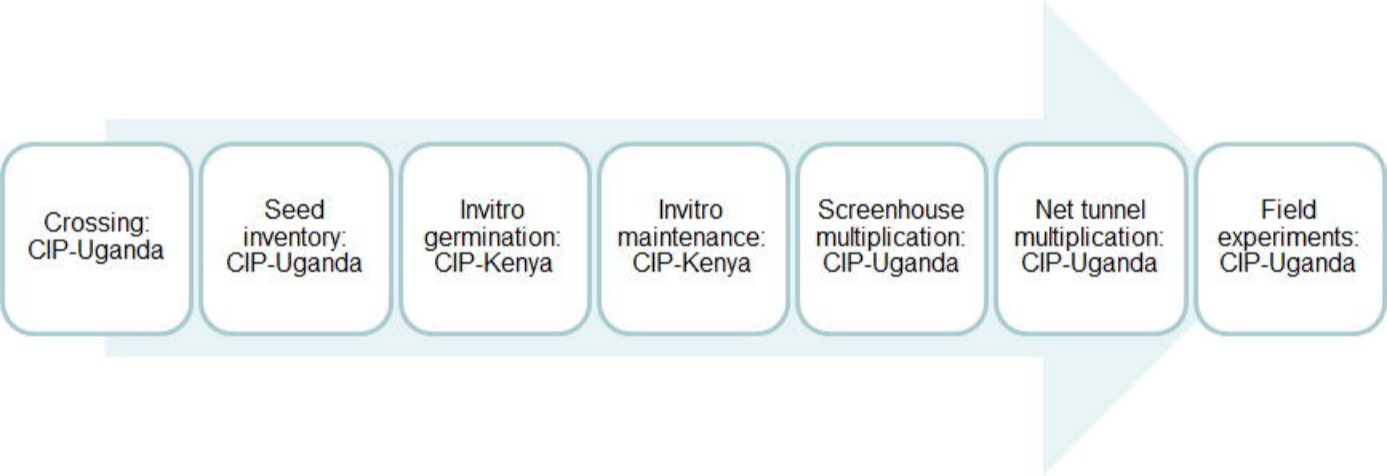

Crossing:  
CIP-Uganda

Seed  
inventory:  
CIP-Uganda

Invitro  
germination:  
CIP-Kenya

Invitro  
maintenance:  
CIP-Kenya

Screenhouse  
multiplication:  
CIP-Uganda

Net tunnel  
multiplication:  
CIP-Uganda

Field  
experiments:  
CIP-Uganda

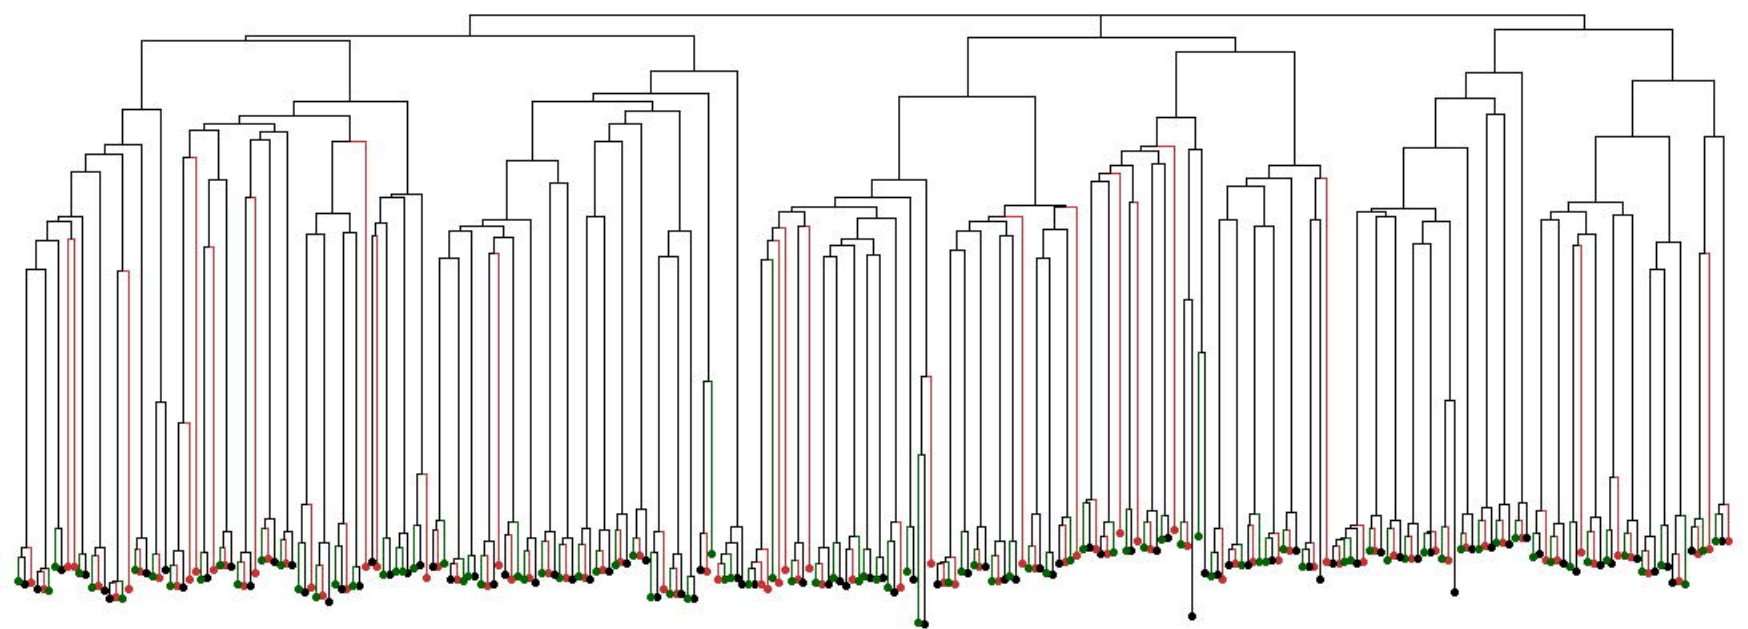

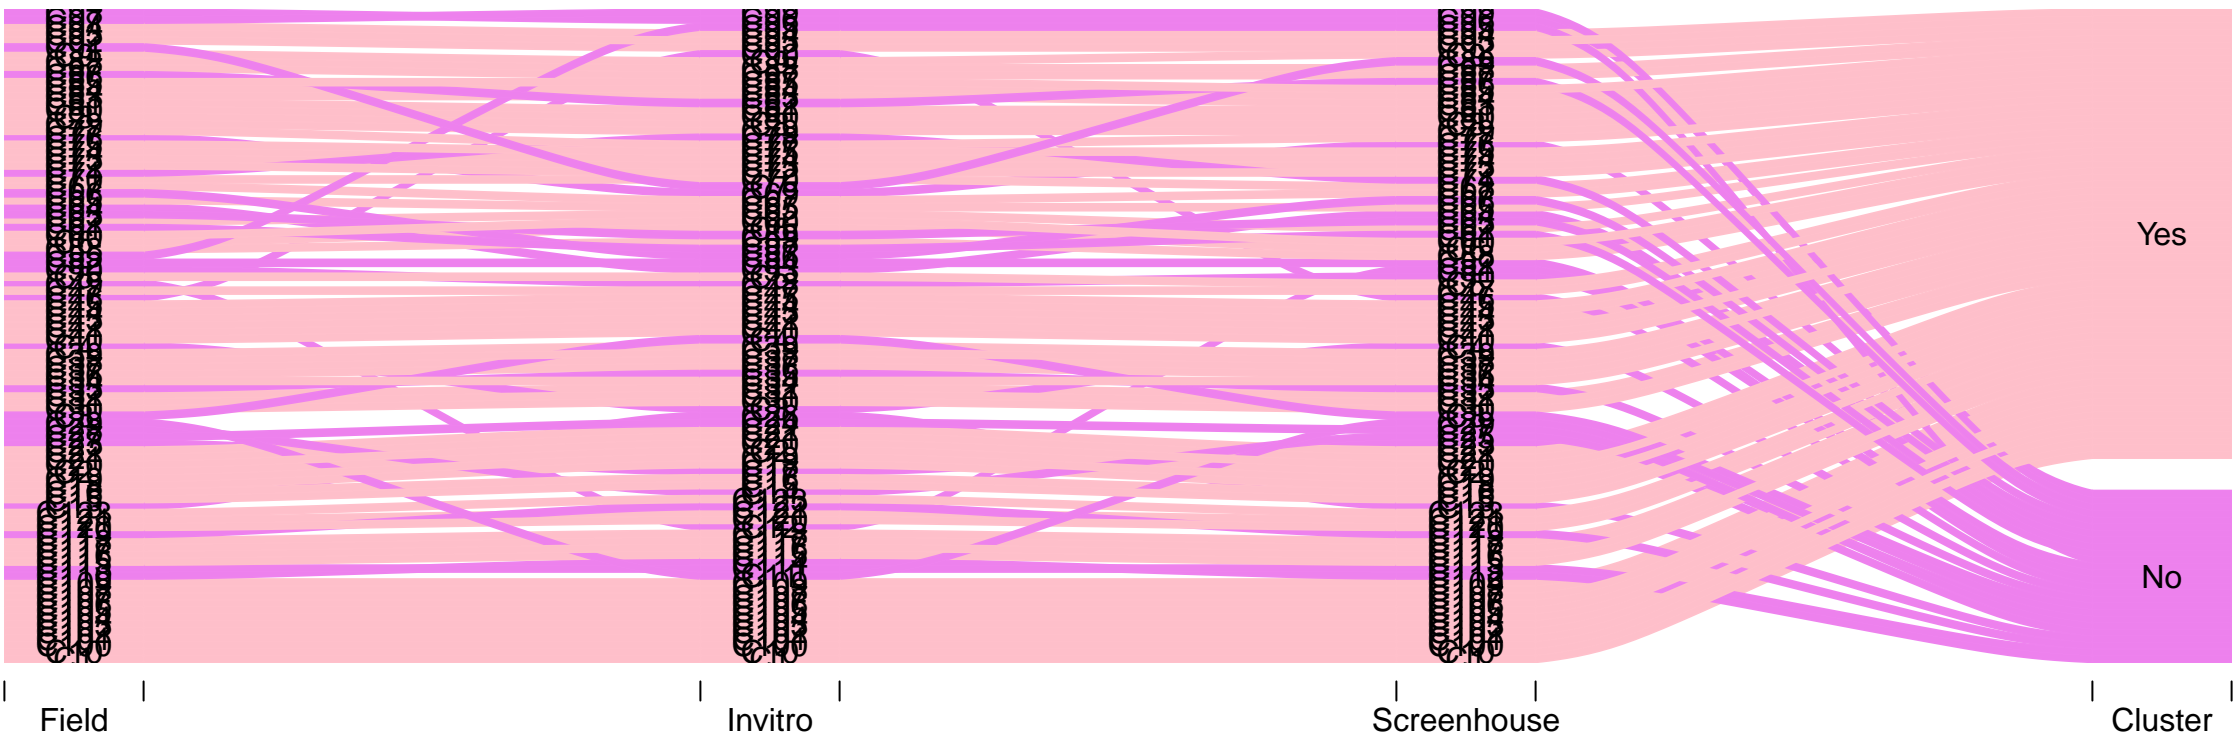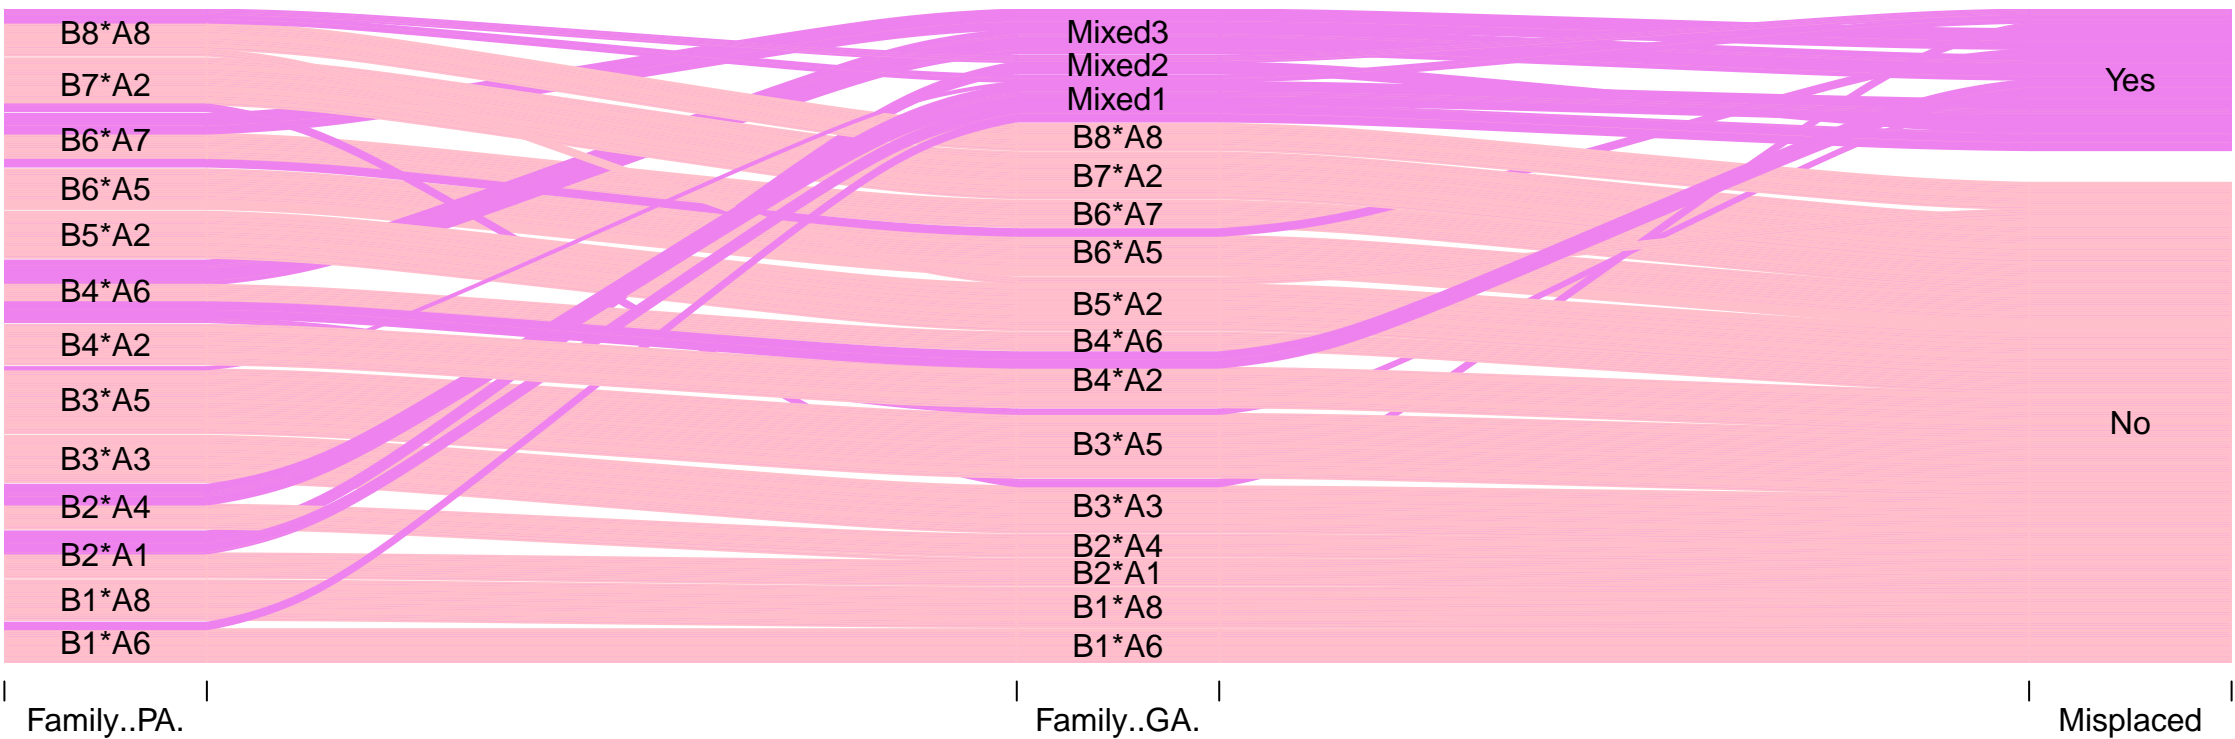

Crossing:  
Peru

Invitro  
germination:  
Peru

DNA  
extraction:  
Peru

Genotyping:  
NCSU

Screenhouse  
multiplication:  
Peru, Ghana,  
Uganda

Field/net  
tunnel  
multiplication:  
Peru, Ghana,  
Uganda

Trialing:  
Peru(6),  
Ghana(8),  
Uganda(6)



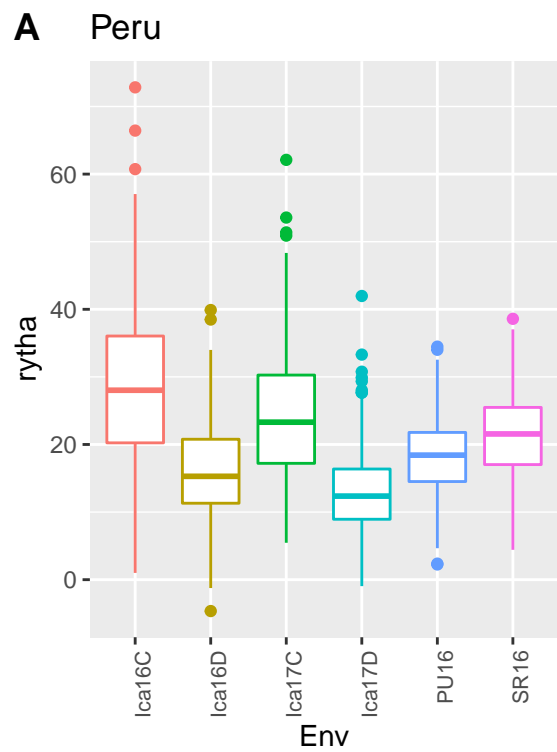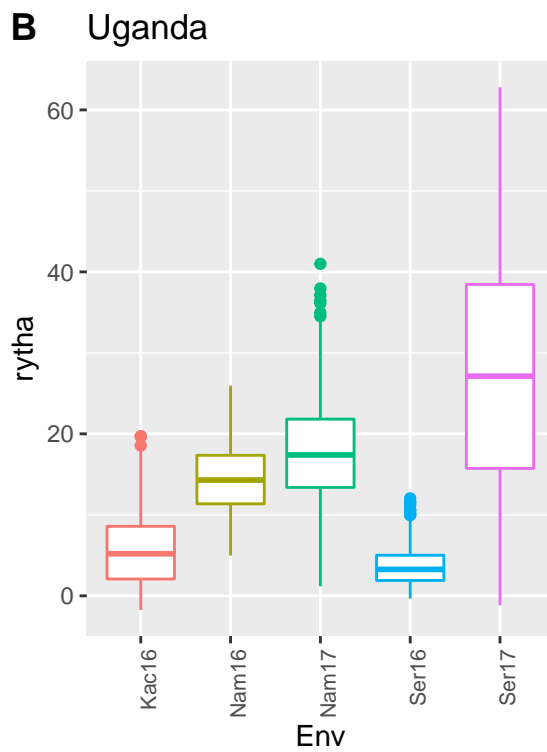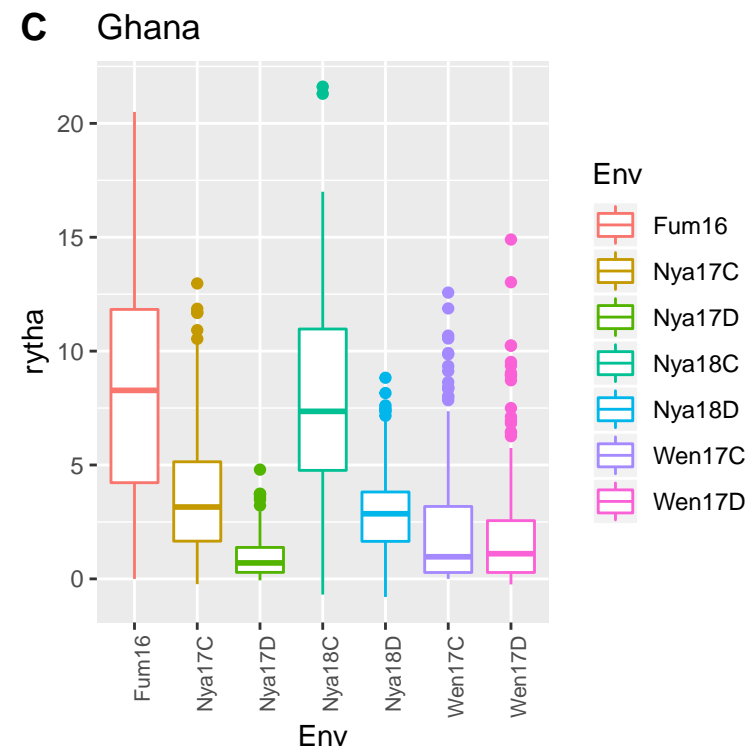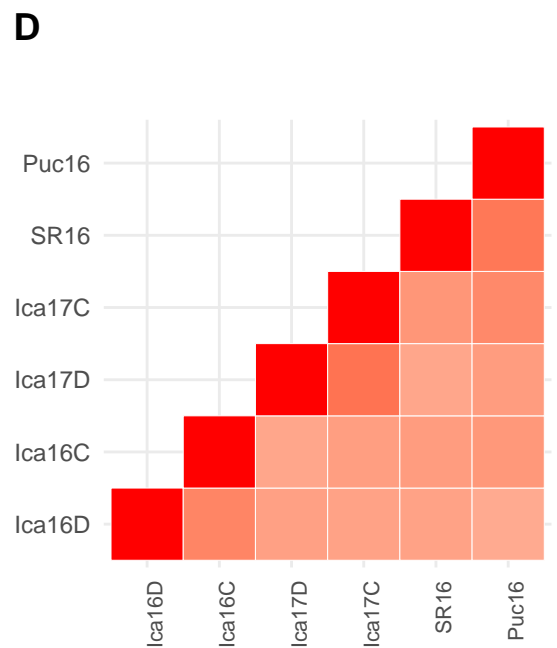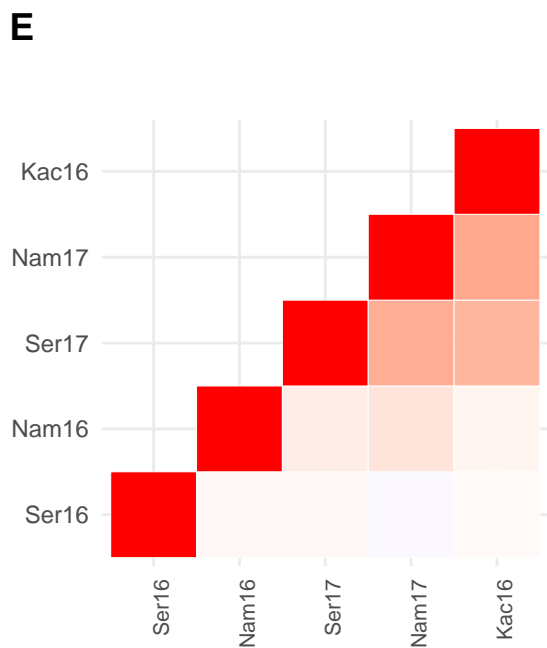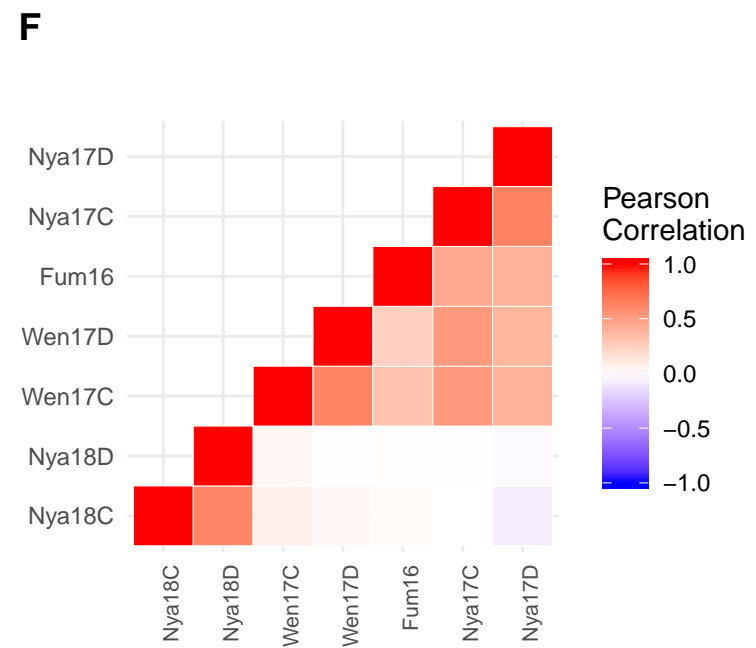



## Mega Environments rytha (ME1, ME2)

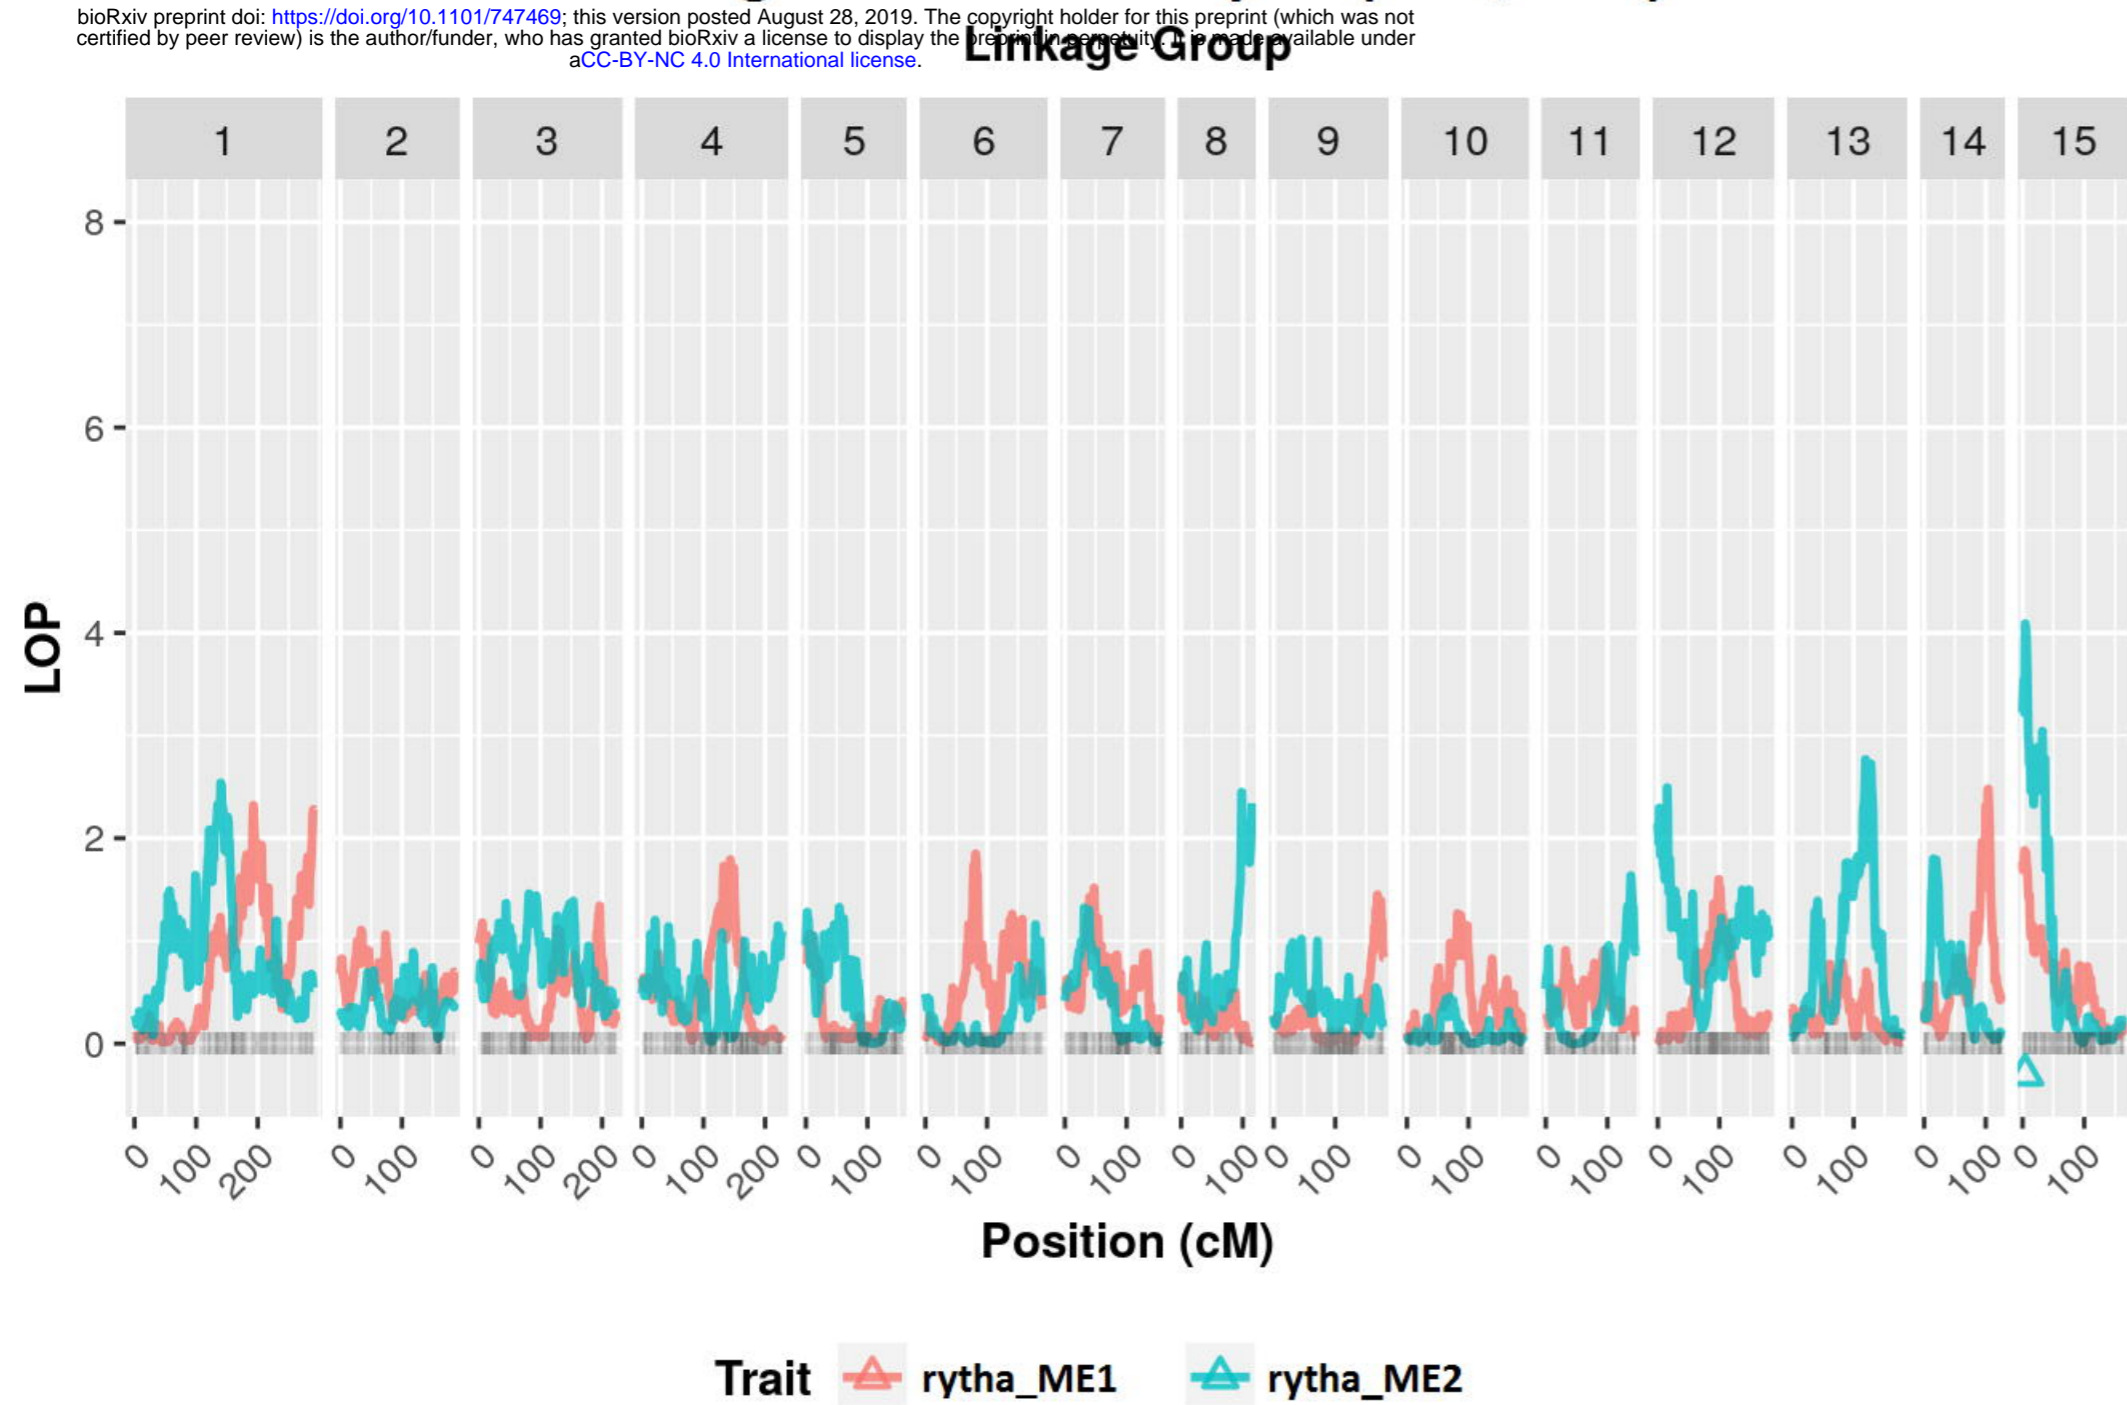

## Single Environments rytha ME2

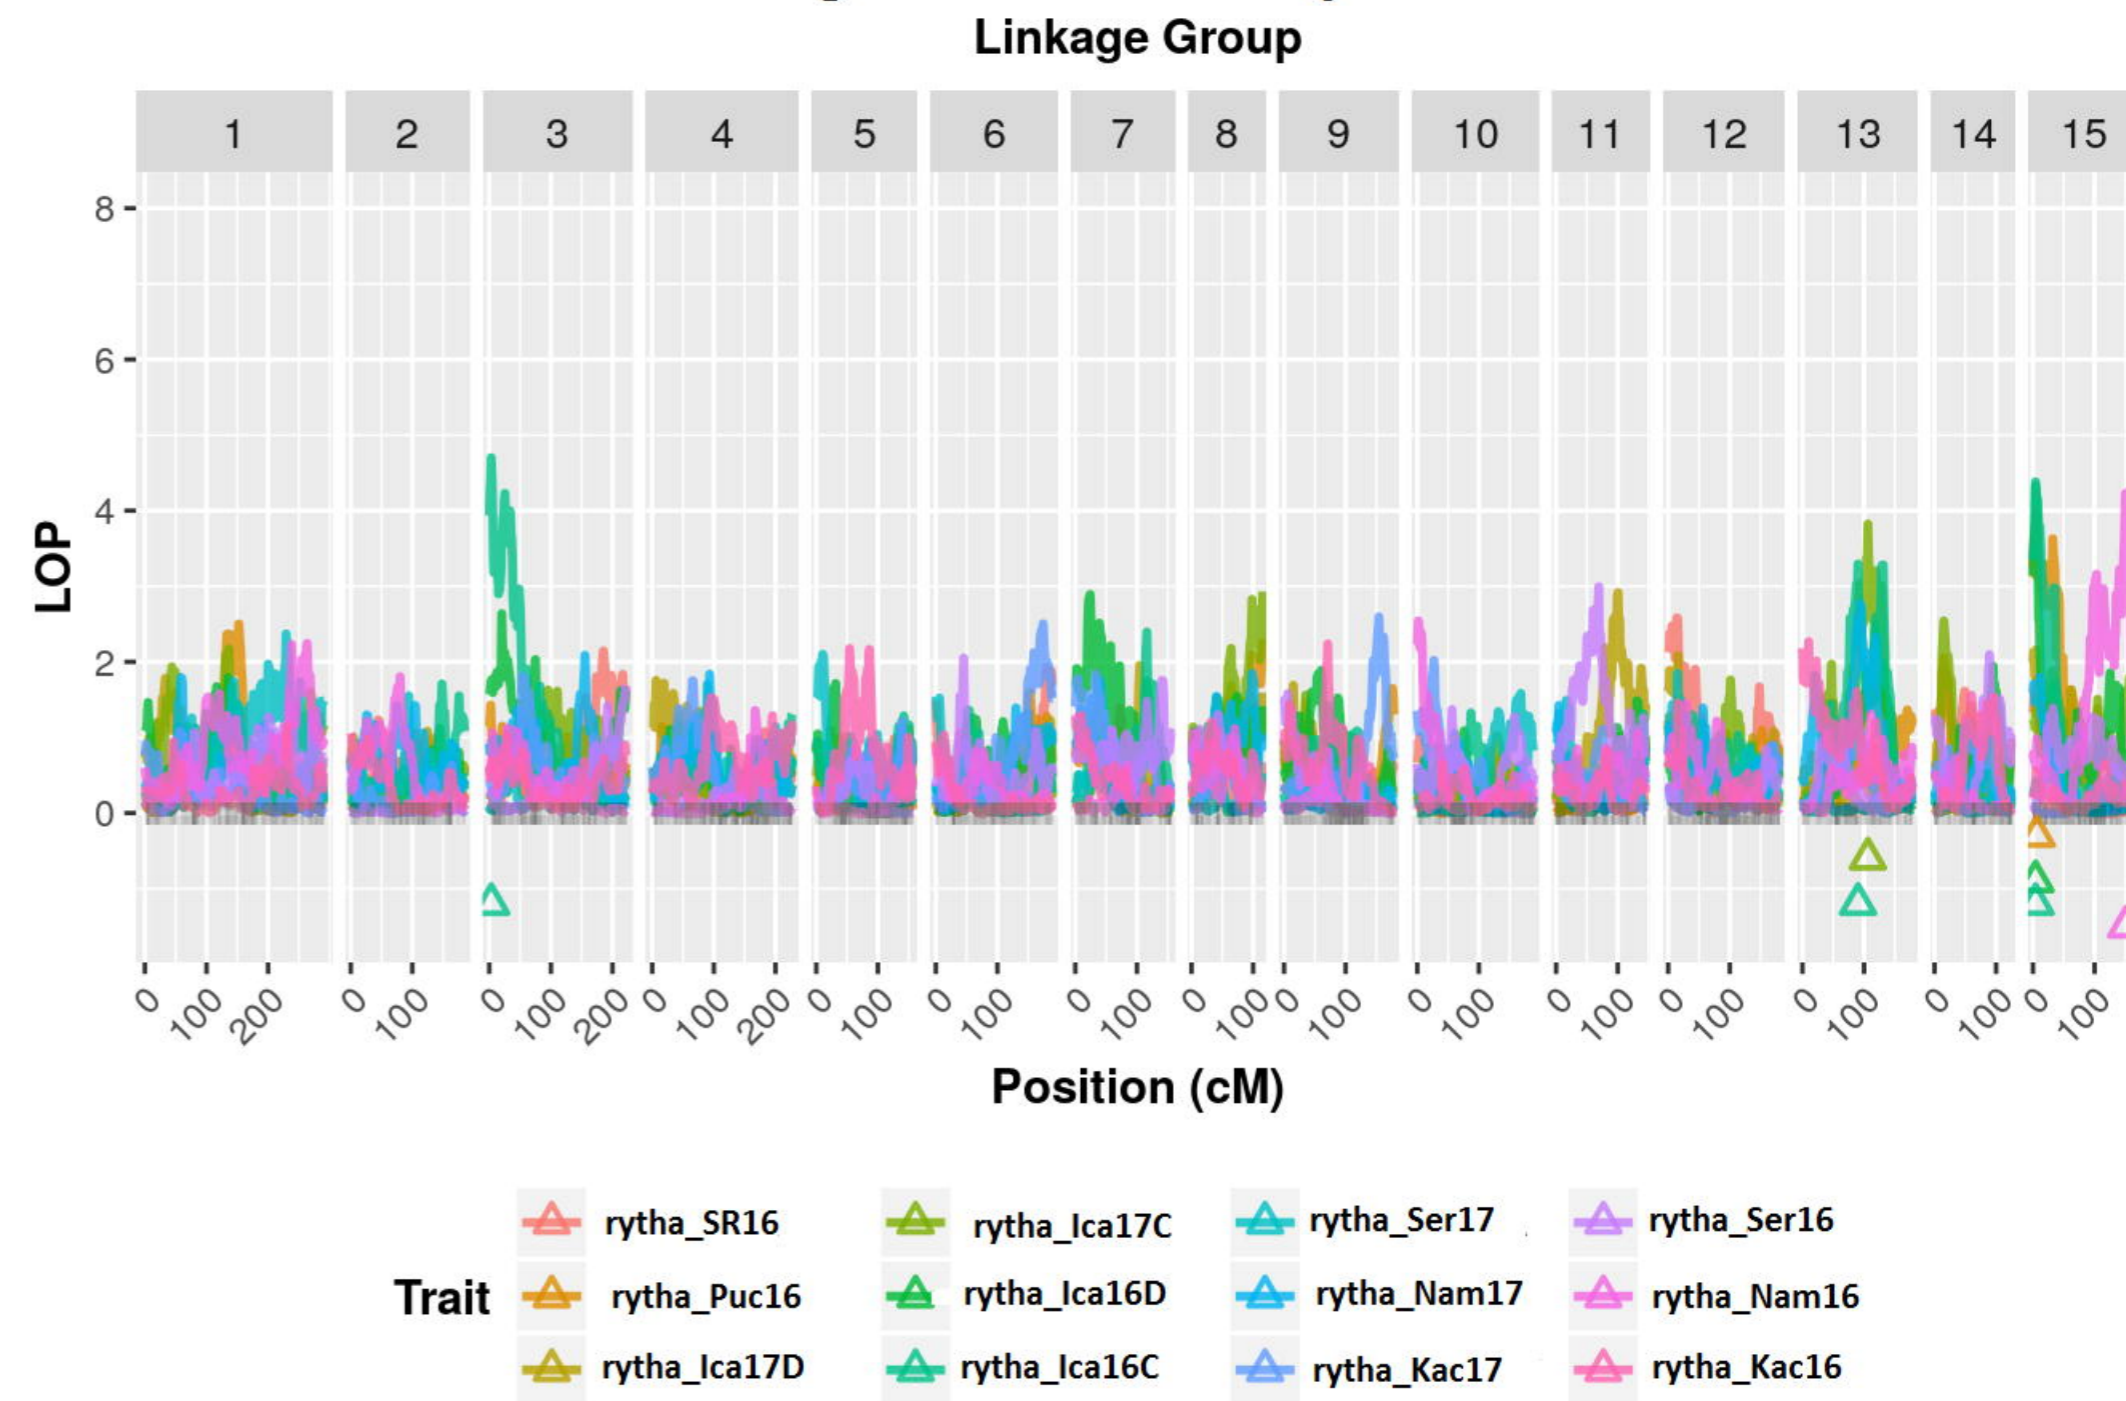

## Allelic effects rytha ME2 QTL 1 (LG 15)

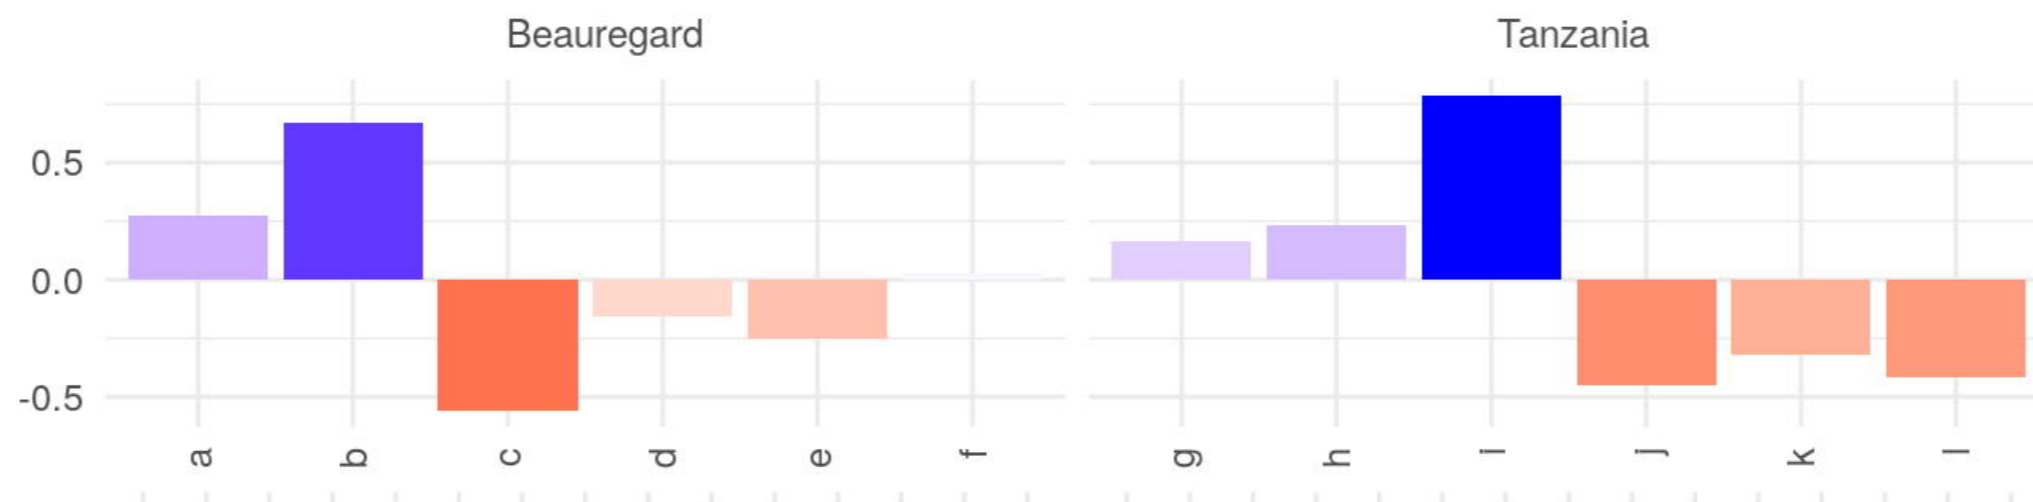

Source: https://www.biorxiv.org/content/10.1101/747469v1.full.pdf
